# Supplementary material for: Forecasting of Short-Term Metro Ridership with Support Vector Machine Online Model
Source: Hindawi journal article supplement (doi:10.1155/2018/3189238), 2018-06-27
Supplement: f1 [file 3189238.f1.pdf]

## Optional Supplementary Materials:

**APPENDIX TABLE 1 The origin 5-min entrance ridership data at Sanshanjie Station of Nanjing Metro from November 5 to December 2 2012**

| date          | 2012/<br>11/5 | 2012/<br>11/6 | 2012/<br>11/7 | 2012/<br>11/8 | 2012/<br>11/9 | 2012/<br>11/10 | 2012/<br>11/11 | 2012/<br>11/12 | 2012/<br>11/13 | 2012/<br>11/14 | 2012/<br>11/15 | 2012/<br>11/16 | 2012/<br>11/17 | 2012/<br>11/18 | 2012/<br>11/19 | 2012/<br>11/20 | 2012/<br>11/21 | 2012/<br>11/22 | 2012/<br>11/23 | 2012/<br>11/24 | 2012/<br>11/25 | 2012/<br>11/26 | 2012/<br>11/27 | 2012/<br>11/28 | 2012/<br>11/29 | 2012/<br>11/30 | 2012/<br>12/1 | 2012/<br>12/2 |
|---------------|---------------|---------------|---------------|---------------|---------------|----------------|----------------|----------------|----------------|----------------|----------------|----------------|----------------|----------------|----------------|----------------|----------------|----------------|----------------|----------------|----------------|----------------|----------------|----------------|----------------|----------------|---------------|---------------|
| 6:00~6<br>:05 | 20            | 22            | 30            | 18            | 14            | 36             | 26             | 28             | 18             | 17             | 19             | 14             | 19             | 29             | 21             | 18             | 13             | 21             | 19             | 25             | 16             | 23             | 13             | 10             | 16             | 14             | 35            | 14            |
| 6:05~6<br>:10 | 37            | 17            | 31            | 26            | 19            | 20             | 30             | 26             | 19             | 20             | 17             | 21             | 25             | 16             | 22             | 27             | 23             | 19             | 19             | 44             | 6              | 23             | 19             | 23             | 15             | 22             | 27            | 19            |
| 6:10~6<br>:15 | 40            | 28            | 34            | 28            | 26            | 31             | 36             | 60             | 23             | 21             | 34             | 27             | 26             | 24             | 40             | 31             | 17             | 33             | 27             | 30             | 34             | 34             | 29             | 27             | 27             | 20             | 41            | 14            |
| 6:15~6<br>:20 | 49            | 31            | 31            | 46            | 34            | 30             | 55             | 39             | 37             | 41             | 36             | 28             | 39             | 32             | 48             | 34             | 34             | 33             | 21             | 32             | 23             | 46             | 24             | 27             | 27             | 28             | 31            | 34            |
| 6:20~6<br>:25 | 67            | 37            | 34            | 46            | 40            | 39             | 54             | 48             | 40             | 35             | 29             | 38             | 40             | 46             | 52             | 34             | 44             | 30             | 37             | 43             | 39             | 63             | 36             | 29             | 36             | 46             | 43            | 26            |
| 6:25~6<br>:30 | 72            | 43            | 50            | 55            | 56            | 34             | 52             | 65             | 44             | 51             | 44             | 47             | 65             | 30             | 89             | 52             | 31             | 36             | 34             | 48             | 39             | 54             | 50             | 52             | 39             | 32             | 63            | 39            |
| 6:30~6<br>:35 | 71            | 61            | 71            | 53            | 58            | 36             | 49             | 65             | 55             | 56             | 54             | 51             | 45             | 56             | 58             | 62             | 70             | 78             | 70             | 53             | 66             | 70             | 67             | 58             | 59             | 54             | 40            | 45            |
| 6:35~6<br>:40 | 71            | 82            | 61            | 69            | 77            | 44             | 60             | 96             | 63             | 72             | 58             | 63             | 60             | 44             | 57             | 70             | 62             | 78             | 49             | 70             | 45             | 88             | 77             | 70             | 70             | 82             | 54            | 34            |
| 6:40~6<br>:45 | 90            | 85            | 90            | 78            | 63            | 48             | 39             | 91             | 95             | 75             | 64             | 63             | 62             | 61             | 102            | 93             | 78             | 85             | 79             | 54             | 57             | 87             | 67             | 65             | 71             | 68             | 69            | 57            |
| 6:45~6<br>:50 | 102           | 116           | 104           | 100           | 92            | 69             | 52             | 125            | 98             | 96             | 79             | 95             | 62             | 59             | 99             | 101            | 85             | 68             | 61             | 70             | 52             | 96             | 86             | 107            | 118            | 90             | 65            | 44            |

|                          |     |     |     |     |     |     |     |     |     |     |     |     |     |     |     |     |     |     |     |     |     |     |     |     |     |     |     |     |
|--------------------------|-----|-----|-----|-----|-----|-----|-----|-----|-----|-----|-----|-----|-----|-----|-----|-----|-----|-----|-----|-----|-----|-----|-----|-----|-----|-----|-----|-----|
| 6:50 <sup>6</sup><br>:55 | 112 | 103 | 105 | 96  | 129 | 76  | 69  | 119 | 109 | 79  | 119 | 101 | 56  | 75  | 119 | 110 | 102 | 91  | 97  | 73  | 72  | 120 | 101 | 124 | 71  | 79  | 45  | 52  |
| 6:55 <sup>7</sup><br>:00 | 138 | 139 | 126 | 123 | 98  | 69  | 57  | 157 | 121 | 121 | 107 | 106 | 93  | 43  | 113 | 127 | 108 | 124 | 115 | 94  | 55  | 128 | 120 | 92  | 115 | 105 | 77  | 57  |
| 7:00 <sup>7</sup><br>:05 | 163 | 167 | 141 | 124 | 145 | 80  | 65  | 147 | 141 | 108 | 121 | 130 | 88  | 82  | 161 | 134 | 118 | 132 | 113 | 105 | 82  | 168 | 167 | 150 | 141 | 117 | 66  | 57  |
| 7:05 <sup>7</sup><br>:10 | 200 | 149 | 140 | 138 | 140 | 89  | 92  | 166 | 134 | 154 | 123 | 128 | 114 | 72  | 145 | 169 | 135 | 150 | 153 | 90  | 68  | 141 | 132 | 156 | 148 | 145 | 66  | 69  |
| 7:10 <sup>7</sup><br>:15 | 231 | 205 | 154 | 152 | 162 | 87  | 72  | 185 | 179 | 169 | 193 | 144 | 102 | 74  | 208 | 168 | 150 | 149 | 159 | 97  | 77  | 185 | 169 | 155 | 155 | 148 | 101 | 86  |
| 7:15 <sup>7</sup><br>:20 | 171 | 205 | 174 | 166 | 131 | 101 | 76  | 186 | 185 | 209 | 171 | 145 | 99  | 72  | 193 | 166 | 181 | 179 | 157 | 119 | 89  | 184 | 189 | 179 | 162 | 163 | 113 | 89  |
| 7:20 <sup>7</sup><br>:25 | 228 | 236 | 221 | 234 | 205 | 124 | 77  | 241 | 208 | 251 | 220 | 236 | 128 | 89  | 223 | 222 | 175 | 171 | 205 | 116 | 119 | 238 | 178 | 214 | 226 | 224 | 121 | 80  |
| 7:25 <sup>7</sup><br>:30 | 285 | 204 | 229 | 226 | 243 | 107 | 75  | 268 | 223 | 195 | 221 | 208 | 144 | 104 | 233 | 227 | 228 | 206 | 241 | 150 | 108 | 264 | 241 | 217 | 210 | 215 | 138 | 83  |
| 7:30 <sup>7</sup><br>:35 | 246 | 241 | 231 | 167 | 232 | 93  | 121 | 193 | 245 | 242 | 216 | 174 | 141 | 87  | 237 | 241 | 260 | 227 | 198 | 106 | 91  | 239 | 216 | 236 | 235 | 223 | 107 | 76  |
| 7:35 <sup>7</sup><br>:40 | 299 | 215 | 243 | 229 | 241 | 136 | 116 | 252 | 211 | 250 | 246 | 248 | 136 | 93  | 292 | 292 | 223 | 255 | 267 | 153 | 100 | 289 | 236 | 235 | 238 | 246 | 106 | 104 |
| 7:40 <sup>7</sup><br>:45 | 324 | 286 | 269 | 256 | 292 | 103 | 107 | 319 | 316 | 272 | 269 | 294 | 179 | 118 | 305 | 291 | 311 | 285 | 264 | 145 | 114 | 260 | 280 | 269 | 273 | 297 | 142 | 86  |
| 7:45 <sup>7</sup><br>:50 | 331 | 310 | 303 | 383 | 309 | 134 | 114 | 326 | 374 | 287 | 307 | 293 | 150 | 105 | 318 | 312 | 329 | 303 | 315 | 133 | 129 | 324 | 296 | 295 | 234 | 272 | 150 | 79  |
| 7:50 <sup>7</sup><br>:55 | 391 | 385 | 385 | 398 | 354 | 125 | 142 | 328 | 334 | 375 | 352 | 355 | 170 | 124 | 365 | 352 | 360 | 401 | 405 | 153 | 148 | 442 | 390 | 376 | 366 | 410 | 165 | 90  |

|           |     |     |     |     |     |     |     |     |     |     |     |     |     |     |     |     |     |     |     |     |     |     |     |     |     |     |     |     |
|-----------|-----|-----|-----|-----|-----|-----|-----|-----|-----|-----|-----|-----|-----|-----|-----|-----|-----|-----|-----|-----|-----|-----|-----|-----|-----|-----|-----|-----|
| 7:55~8:00 | 386 | 460 | 431 | 427 | 482 | 171 | 135 | 474 | 427 | 386 | 426 | 452 | 185 | 111 | 432 | 439 | 384 | 411 | 380 | 168 | 113 | 385 | 419 | 447 | 374 | 427 | 161 | 111 |
| 8:00~8:05 | 467 | 447 | 430 | 399 | 389 | 149 | 118 | 427 | 434 | 390 | 438 | 418 | 231 | 143 | 502 | 416 | 530 | 475 | 373 | 168 | 133 | 430 | 476 | 447 | 352 | 427 | 179 | 141 |
| 8:05~8:10 | 400 | 407 | 466 | 487 | 450 | 137 | 164 | 442 | 425 | 467 | 416 | 472 | 214 | 142 | 421 | 472 | 433 | 470 | 537 | 199 | 158 | 481 | 492 | 508 | 446 | 423 | 185 | 118 |
| 8:10~8:15 | 464 | 397 | 455 | 434 | 433 | 188 | 158 | 400 | 417 | 412 | 442 | 455 | 206 | 183 | 450 | 441 | 477 | 439 | 452 | 222 | 127 | 419 | 415 | 373 | 480 | 450 | 164 | 162 |
| 8:15~8:20 | 373 | 420 | 397 | 421 | 424 | 195 | 190 | 486 | 390 | 426 | 437 | 377 | 249 | 166 | 464 | 405 | 418 | 369 | 434 | 172 | 152 | 421 | 394 | 420 | 380 | 391 | 198 | 128 |
| 8:20~8:25 | 394 | 385 | 340 | 375 | 418 | 170 | 150 | 345 | 430 | 371 | 294 | 335 | 236 | 148 | 341 | 371 | 394 | 384 | 343 | 225 | 175 | 469 | 336 | 361 | 340 | 342 | 194 | 138 |
| 8:25~8:30 | 369 | 335 | 376 | 364 | 378 | 167 | 177 | 395 | 335 | 378 | 317 | 376 | 195 | 159 | 380 | 467 | 333 | 359 | 453 | 209 | 136 | 349 | 383 | 397 | 388 | 383 | 181 | 116 |
| 8:30~8:35 | 328 | 316 | 301 | 377 | 328 | 183 | 176 | 375 | 343 | 361 | 389 | 310 | 233 | 145 | 346 | 326 | 399 | 385 | 322 | 171 | 138 | 417 | 391 | 380 | 351 | 349 | 193 | 122 |
| 8:35~8:40 | 362 | 336 | 385 | 317 | 395 | 189 | 182 | 343 | 363 | 312 | 338 | 354 | 188 | 148 | 359 | 354 | 329 | 309 | 358 | 186 | 116 | 348 | 338 | 337 | 392 | 398 | 196 | 140 |
| 8:40~8:45 | 254 | 308 | 316 | 294 | 336 | 203 | 203 | 350 | 253 | 298 | 295 | 286 | 174 | 156 | 311 | 297 | 308 | 330 | 323 | 153 | 123 | 302 | 260 | 276 | 269 | 342 | 186 | 170 |
| 8:45~8:50 | 233 | 226 | 276 | 230 | 257 | 170 | 185 | 272 | 237 | 259 | 273 | 231 | 185 | 161 | 253 | 264 | 292 | 257 | 207 | 172 | 114 | 261 | 300 | 249 | 264 | 239 | 156 | 128 |
| 8:50~8:55 | 167 | 229 | 244 | 214 | 267 | 174 | 159 | 267 | 251 | 216 | 226 | 252 | 182 | 168 | 216 | 210 | 233 | 218 | 302 | 165 | 126 | 198 | 256 | 231 | 201 | 213 | 161 | 149 |
| 8:55~9:00 | 200 | 174 | 228 | 209 | 202 | 157 | 240 | 223 | 197 | 209 | 212 | 186 | 182 | 170 | 173 | 204 | 189 | 200 | 187 | 154 | 139 | 258 | 212 | 191 | 231 | 185 | 150 | 142 |

|             |     |     |     |     |     |     |     |     |     |     |     |     |     |     |     |     |     |     |     |     |     |     |     |     |     |     |     |     |
|-------------|-----|-----|-----|-----|-----|-----|-----|-----|-----|-----|-----|-----|-----|-----|-----|-----|-----|-----|-----|-----|-----|-----|-----|-----|-----|-----|-----|-----|
| 9:00~9:05   | 224 | 197 | 149 | 180 | 198 | 157 | 174 | 245 | 243 | 187 | 142 | 189 | 151 | 153 | 181 | 266 | 215 | 185 | 204 | 145 | 130 | 200 | 207 | 217 | 228 | 229 | 176 | 135 |
| 9:05~9:10   | 173 | 158 | 135 | 168 | 165 | 181 | 120 | 193 | 169 | 167 | 160 | 195 | 135 | 164 | 197 | 188 | 167 | 169 | 204 | 150 | 118 | 178 | 162 | 177 | 208 | 185 | 168 | 134 |
| 9:10~9:15   | 134 | 154 | 172 | 165 | 208 | 182 | 193 | 194 | 140 | 141 | 174 | 163 | 194 | 164 | 154 | 183 | 138 | 147 | 150 | 142 | 123 | 191 | 168 | 156 | 135 | 148 | 156 | 139 |
| 9:15~9:20   | 188 | 169 | 150 | 153 | 194 | 171 | 206 | 151 | 164 | 161 | 160 | 168 | 152 | 168 | 142 | 159 | 180 | 160 | 137 | 145 | 111 | 184 | 217 | 177 | 165 | 180 | 140 | 115 |
| 9:20~9:25   | 133 | 140 | 123 | 167 | 167 | 170 | 205 | 181 | 147 | 168 | 145 | 174 | 144 | 187 | 131 | 149 | 161 | 190 | 144 | 155 | 123 | 140 | 166 | 175 | 182 | 173 | 147 | 141 |
| 9:25~9:30   | 141 | 122 | 142 | 135 | 147 | 157 | 209 | 136 | 141 | 140 | 181 | 139 | 125 | 137 | 162 | 140 | 147 | 119 | 150 | 155 | 132 | 167 | 177 | 131 | 173 | 128 | 159 | 117 |
| 9:30~9:35   | 146 | 140 | 139 | 155 | 150 | 172 | 184 | 163 | 150 | 141 | 187 | 132 | 192 | 150 | 137 | 145 | 140 | 174 | 114 | 174 | 138 | 151 | 165 | 162 | 129 | 153 | 153 | 144 |
| 9:35~9:40   | 137 | 161 | 156 | 149 | 134 | 186 | 177 | 168 | 144 | 172 | 160 | 132 | 130 | 171 | 158 | 159 | 149 | 122 | 146 | 164 | 119 | 126 | 160 | 141 | 168 | 147 | 180 | 185 |
| 9:40~9:45   | 159 | 120 | 162 | 161 | 143 | 186 | 205 | 170 | 180 | 138 | 152 | 169 | 171 | 153 | 174 | 147 | 135 | 167 | 113 | 169 | 122 | 126 | 139 | 167 | 140 | 125 | 194 | 127 |
| 9:45~9:50   | 157 | 171 | 168 | 104 | 174 | 162 | 203 | 159 | 151 | 148 | 144 | 157 | 140 | 167 | 143 | 134 | 103 | 135 | 151 | 184 | 120 | 151 | 150 | 194 | 123 | 123 | 195 | 167 |
| 9:50~9:55   | 139 | 122 | 118 | 118 | 138 | 150 | 152 | 181 | 125 | 142 | 157 | 151 | 171 | 172 | 120 | 134 | 122 | 119 | 118 | 132 | 125 | 168 | 120 | 148 | 151 | 131 | 175 | 163 |
| 9:55~10:00  | 119 | 117 | 112 | 127 | 111 | 144 | 177 | 143 | 123 | 129 | 121 | 130 | 162 | 182 | 129 | 126 | 127 | 134 | 131 | 123 | 157 | 134 | 131 | 145 | 137 | 109 | 142 | 143 |
| 10:00~10:05 | 145 | 115 | 148 | 112 | 127 | 162 | 209 | 150 | 138 | 110 | 127 | 129 | 150 | 197 | 150 | 117 | 110 | 109 | 130 | 153 | 166 | 139 | 171 | 128 | 142 | 125 | 144 | 155 |

|                 |     |     |     |     |     |     |     |     |     |     |     |     |     |     |     |     |     |     |     |     |     |     |     |     |     |     |     |     |
|-----------------|-----|-----|-----|-----|-----|-----|-----|-----|-----|-----|-----|-----|-----|-----|-----|-----|-----|-----|-----|-----|-----|-----|-----|-----|-----|-----|-----|-----|
| 10:05~<br>10:10 | 113 | 116 | 94  | 128 | 117 | 173 | 185 | 152 | 136 | 130 | 119 | 157 | 181 | 154 | 134 | 137 | 90  | 112 | 160 | 141 | 113 | 139 | 131 | 149 | 127 | 123 | 149 | 145 |
| 10:10~<br>10:15 | 114 | 115 | 131 | 105 | 140 | 190 | 186 | 160 | 116 | 114 | 105 | 143 | 175 | 186 | 132 | 130 | 132 | 127 | 136 | 210 | 123 | 159 | 124 | 124 | 110 | 124 | 140 | 165 |
| 10:15~<br>10:20 | 136 | 97  | 134 | 102 | 126 | 164 | 165 | 159 | 129 | 159 | 126 | 112 | 153 | 188 | 144 | 133 | 119 | 113 | 128 | 165 | 107 | 146 | 130 | 114 | 102 | 119 | 159 | 165 |
| 10:20~<br>10:25 | 140 | 116 | 108 | 106 | 123 | 191 | 229 | 142 | 137 | 143 | 134 | 118 | 169 | 179 | 122 | 110 | 150 | 99  | 140 | 160 | 145 | 108 | 99  | 126 | 131 | 119 | 166 | 195 |
| 10:25~<br>10:30 | 134 | 106 | 104 | 136 | 125 | 132 | 191 | 122 | 120 | 126 | 99  | 142 | 142 | 186 | 117 | 126 | 115 | 98  | 108 | 165 | 130 | 119 | 115 | 146 | 88  | 97  | 173 | 156 |
| 10:30~<br>10:35 | 97  | 120 | 110 | 109 | 87  | 154 | 158 | 120 | 114 | 97  | 126 | 143 | 151 | 182 | 121 | 112 | 116 | 106 | 135 | 157 | 156 | 147 | 116 | 114 | 120 | 120 | 135 | 141 |
| 10:35~<br>10:40 | 94  | 158 | 136 | 116 | 126 | 191 | 203 | 132 | 117 | 100 | 122 | 133 | 125 | 157 | 133 | 122 | 106 | 117 | 140 | 197 | 163 | 123 | 102 | 98  | 90  | 113 | 181 | 178 |
| 10:40~<br>10:45 | 101 | 137 | 104 | 130 | 110 | 166 | 201 | 139 | 132 | 146 | 135 | 114 | 139 | 185 | 107 | 113 | 113 | 102 | 114 | 141 | 131 | 132 | 133 | 108 | 98  | 122 | 150 | 164 |
| 10:45~<br>10:50 | 119 | 107 | 111 | 111 | 117 | 158 | 201 | 131 | 89  | 130 | 122 | 111 | 196 | 168 | 122 | 118 | 121 | 115 | 120 | 157 | 160 | 127 | 121 | 128 | 89  | 106 | 183 | 167 |
| 10:50~<br>10:55 | 126 | 110 | 109 | 125 | 103 | 192 | 189 | 138 | 149 | 98  | 139 | 130 | 167 | 198 | 138 | 131 | 115 | 126 | 122 | 171 | 142 | 107 | 115 | 104 | 97  | 114 | 160 | 155 |
| 10:55~<br>11:00 | 93  | 128 | 96  | 119 | 120 | 190 | 215 | 143 | 122 | 106 | 126 | 106 | 166 | 217 | 96  | 102 | 135 | 97  | 113 | 169 | 165 | 131 | 131 | 115 | 145 | 126 | 183 | 190 |
| 11:00~<br>11:05 | 118 | 122 | 117 | 132 | 99  | 175 | 228 | 124 | 106 | 140 | 93  | 109 | 148 | 199 | 89  | 91  | 129 | 128 | 111 | 162 | 170 | 158 | 132 | 140 | 114 | 111 | 157 | 204 |
| 11:05~<br>11:10 | 108 | 108 | 113 | 117 | 143 | 178 | 247 | 147 | 103 | 93  | 148 | 118 | 149 | 244 | 95  | 137 | 105 | 103 | 125 | 153 | 164 | 151 | 122 | 99  | 100 | 126 | 152 | 182 |

|                 |     |     |     |     |     |     |     |     |     |     |     |     |     |     |     |     |     |     |     |     |     |     |     |     |     |     |     |     |
|-----------------|-----|-----|-----|-----|-----|-----|-----|-----|-----|-----|-----|-----|-----|-----|-----|-----|-----|-----|-----|-----|-----|-----|-----|-----|-----|-----|-----|-----|
| 11:10~<br>11:15 | 119 | 111 | 101 | 111 | 113 | 160 | 211 | 144 | 132 | 120 | 115 | 137 | 152 | 177 | 113 | 105 | 113 | 111 | 109 | 186 | 131 | 134 | 139 | 93  | 110 | 99  | 180 | 203 |
| 11:15~<br>11:20 | 99  | 115 | 92  | 112 | 104 | 154 | 184 | 148 | 148 | 105 | 127 | 116 | 153 | 192 | 119 | 105 | 108 | 100 | 139 | 204 | 156 | 131 | 117 | 128 | 132 | 134 | 164 | 174 |
| 11:20~<br>11:25 | 109 | 128 | 115 | 121 | 124 | 210 | 255 | 143 | 132 | 128 | 115 | 121 | 178 | 179 | 128 | 81  | 97  | 108 | 155 | 176 | 157 | 139 | 104 | 105 | 118 | 130 | 173 | 200 |
| 11:25~<br>11:30 | 140 | 140 | 93  | 82  | 106 | 208 | 214 | 132 | 111 | 119 | 130 | 132 | 196 | 195 | 122 | 128 | 102 | 125 | 137 | 180 | 141 | 133 | 122 | 111 | 121 | 120 | 196 | 169 |
| 11:30~<br>11:35 | 140 | 141 | 119 | 125 | 115 | 215 | 280 | 213 | 130 | 127 | 108 | 141 | 199 | 219 | 131 | 112 | 94  | 117 | 129 | 174 | 172 | 132 | 115 | 120 | 130 | 130 | 193 | 172 |
| 11:35~<br>11:40 | 164 | 123 | 109 | 122 | 123 | 203 | 288 | 144 | 128 | 135 | 130 | 130 | 205 | 194 | 104 | 160 | 114 | 137 | 117 | 236 | 190 | 153 | 134 | 143 | 115 | 148 | 161 | 195 |
| 11:40~<br>11:45 | 139 | 151 | 137 | 112 | 150 | 191 | 238 | 144 | 124 | 141 | 119 | 163 | 177 | 227 | 133 | 134 | 104 | 123 | 146 | 227 | 159 | 134 | 124 | 132 | 127 | 158 | 149 | 206 |
| 11:45~<br>11:50 | 125 | 130 | 107 | 146 | 125 | 208 | 225 | 153 | 132 | 142 | 126 | 142 | 147 | 235 | 131 | 120 | 133 | 135 | 122 | 177 | 219 | 164 | 113 | 146 | 132 | 142 | 177 | 242 |
| 11:50~<br>11:55 | 134 | 143 | 129 | 98  | 129 | 199 | 216 | 151 | 127 | 127 | 156 | 142 | 201 | 193 | 154 | 125 | 108 | 154 | 136 | 196 | 198 | 139 | 136 | 119 | 135 | 139 | 194 | 271 |
| 11:55~<br>12:00 | 130 | 115 | 134 | 120 | 124 | 191 | 247 | 135 | 128 | 162 | 141 | 129 | 184 | 202 | 90  | 103 | 131 | 133 | 114 | 172 | 192 | 128 | 119 | 132 | 124 | 127 | 214 | 172 |
| 12:00~<br>12:05 | 146 | 149 | 128 | 159 | 121 | 203 | 277 | 149 | 170 | 144 | 151 | 158 | 216 | 253 | 146 | 158 | 145 | 105 | 106 | 194 | 157 | 199 | 143 | 144 | 125 | 153 | 209 | 229 |
| 12:05~<br>12:10 | 128 | 150 | 140 | 136 | 147 | 184 | 279 | 141 | 167 | 158 | 140 | 156 | 234 | 222 | 158 | 145 | 108 | 117 | 139 | 205 | 187 | 150 | 130 | 141 | 119 | 154 | 218 | 245 |
| 12:10~<br>12:15 | 143 | 148 | 131 | 134 | 151 | 223 | 252 | 156 | 126 | 145 | 137 | 139 | 232 | 263 | 138 | 124 | 130 | 142 | 143 | 203 | 183 | 170 | 155 | 157 | 103 | 156 | 232 | 211 |

|                 |     |     |     |     |     |     |     |     |     |     |     |     |     |     |     |     |     |     |     |     |     |     |     |     |     |     |     |     |
|-----------------|-----|-----|-----|-----|-----|-----|-----|-----|-----|-----|-----|-----|-----|-----|-----|-----|-----|-----|-----|-----|-----|-----|-----|-----|-----|-----|-----|-----|
| 12:15~<br>12:20 | 151 | 124 | 124 | 124 | 139 | 233 | 272 | 156 | 157 | 147 | 152 | 141 | 234 | 279 | 124 | 117 | 142 | 139 | 128 | 235 | 213 | 174 | 126 | 129 | 133 | 135 | 228 | 249 |
| 12:20~<br>12:25 | 145 | 145 | 128 | 118 | 133 | 225 | 281 | 174 | 153 | 141 | 139 | 147 | 230 | 251 | 136 | 114 | 124 | 133 | 119 | 240 | 222 | 151 | 145 | 135 | 131 | 170 | 220 | 213 |
| 12:25~<br>12:30 | 191 | 126 | 127 | 110 | 108 | 289 | 284 | 140 | 128 | 146 | 150 | 134 | 245 | 256 | 136 | 149 | 145 | 148 | 166 | 224 | 204 | 174 | 127 | 178 | 96  | 154 | 222 | 254 |
| 12:30~<br>12:35 | 145 | 147 | 143 | 136 | 139 | 273 | 275 | 133 | 151 | 156 | 121 | 160 | 233 | 317 | 179 | 130 | 124 | 112 | 132 | 248 | 245 | 141 | 122 | 146 | 127 | 158 | 218 | 289 |
| 12:35~<br>12:40 | 131 | 160 | 147 | 147 | 114 | 310 | 348 | 149 | 143 | 110 | 149 | 147 | 259 | 285 | 172 | 129 | 125 | 120 | 146 | 298 | 244 | 147 | 146 | 132 | 112 | 159 | 283 | 300 |
| 12:40~<br>12:45 | 134 | 137 | 150 | 136 | 153 | 270 | 286 | 156 | 142 | 169 | 167 | 136 | 286 | 248 | 138 | 172 | 173 | 148 | 142 | 256 | 220 | 160 | 138 | 152 | 152 | 140 | 259 | 276 |
| 12:45~<br>12:50 | 132 | 132 | 107 | 110 | 155 | 288 | 293 | 136 | 172 | 143 | 138 | 170 | 248 | 287 | 171 | 147 | 152 | 162 | 138 | 292 | 258 | 129 | 133 | 143 | 127 | 148 | 254 | 249 |
| 12:50~<br>12:55 | 165 | 133 | 143 | 121 | 169 | 264 | 293 | 163 | 133 | 164 | 157 | 206 | 251 | 312 | 154 | 163 | 129 | 150 | 193 | 277 | 202 | 152 | 136 | 132 | 161 | 161 | 224 | 261 |
| 12:55~<br>13:00 | 180 | 122 | 140 | 153 | 144 | 231 | 344 | 199 | 134 | 176 | 145 | 198 | 291 | 280 | 158 | 165 | 140 | 136 | 139 | 275 | 246 | 176 | 158 | 169 | 141 | 163 | 239 | 296 |
| 13:00~<br>13:05 | 174 | 166 | 168 | 147 | 140 | 254 | 369 | 166 | 182 | 139 | 164 | 164 | 304 | 284 | 150 | 177 | 144 | 154 | 139 | 261 | 252 | 177 | 157 | 150 | 151 | 198 | 282 | 270 |
| 13:05~<br>13:10 | 138 | 145 | 157 | 140 | 186 | 296 | 372 | 177 | 161 | 149 | 172 | 138 | 314 | 285 | 175 | 160 | 148 | 171 | 152 | 274 | 262 | 180 | 163 | 166 | 159 | 181 | 292 | 281 |
| 13:10~<br>13:15 | 163 | 161 | 139 | 124 | 173 | 296 | 355 | 169 | 182 | 171 | 190 | 173 | 340 | 323 | 153 | 156 | 144 | 141 | 166 | 318 | 289 | 178 | 159 | 149 | 143 | 199 | 283 | 308 |
| 13:15~<br>13:20 | 165 | 156 | 155 | 149 | 202 | 287 | 384 | 193 | 151 | 182 | 150 | 250 | 314 | 314 | 197 | 212 | 147 | 173 | 214 | 347 | 309 | 176 | 137 | 162 | 183 | 208 | 307 | 282 |

|                 |     |     |     |     |     |     |     |     |     |     |     |     |     |     |     |     |     |     |     |     |     |     |     |     |     |     |     |     |
|-----------------|-----|-----|-----|-----|-----|-----|-----|-----|-----|-----|-----|-----|-----|-----|-----|-----|-----|-----|-----|-----|-----|-----|-----|-----|-----|-----|-----|-----|
| 13:20~<br>13:25 | 183 | 158 | 151 | 137 | 211 | 274 | 404 | 207 | 195 | 189 | 145 | 277 | 313 | 307 | 202 | 177 | 185 | 164 | 245 | 271 | 290 | 203 | 209 | 157 | 173 | 200 | 259 | 321 |
| 13:25~<br>13:30 | 181 | 168 | 143 | 174 | 235 | 326 | 341 | 198 | 192 | 152 | 180 | 246 | 342 | 326 | 187 | 192 | 151 | 176 | 236 | 320 | 234 | 217 | 179 | 171 | 200 | 253 | 291 | 304 |
| 13:30~<br>13:35 | 169 | 155 | 203 | 165 | 211 | 314 | 369 | 223 | 165 | 187 | 202 | 251 | 297 | 363 | 170 | 190 | 161 | 180 | 266 | 328 | 233 | 143 | 193 | 169 | 161 | 250 | 307 | 297 |
| 13:35~<br>13:40 | 168 | 220 | 190 | 152 | 248 | 359 | 383 | 207 | 188 | 166 | 177 | 204 | 353 | 342 | 202 | 207 | 153 | 202 | 184 | 346 | 276 | 171 | 249 | 159 | 209 | 233 | 344 | 333 |
| 13:40~<br>13:45 | 169 | 166 | 199 | 153 | 216 | 354 | 374 | 243 | 182 | 179 | 185 | 210 | 321 | 336 | 206 | 174 | 163 | 166 | 222 | 385 | 324 | 199 | 166 | 158 | 181 | 212 | 292 | 357 |
| 13:45~<br>13:50 | 186 | 155 | 166 | 167 | 208 | 365 | 401 | 210 | 207 | 173 | 184 | 173 | 325 | 339 | 172 | 216 | 150 | 172 | 219 | 347 | 256 | 206 | 176 | 167 | 188 | 172 | 347 | 340 |
| 13:50~<br>13:55 | 216 | 151 | 158 | 186 | 186 | 348 | 422 | 204 | 184 | 173 | 163 | 197 | 345 | 324 | 213 | 190 | 176 | 157 | 190 | 326 | 264 | 195 | 205 | 183 | 168 | 202 | 314 | 338 |
| 13:55~<br>14:00 | 186 | 199 | 203 | 136 | 200 | 368 | 421 | 214 | 168 | 204 | 183 | 241 | 327 | 370 | 191 | 197 | 171 | 198 | 219 | 367 | 243 | 204 | 172 | 177 | 188 | 224 | 306 | 360 |
| 14:00~<br>14:05 | 184 | 192 | 165 | 145 | 181 | 363 | 442 | 204 | 169 | 137 | 197 | 200 | 391 | 354 | 180 | 165 | 177 | 165 | 178 | 306 | 290 | 205 | 178 | 184 | 180 | 213 | 306 | 336 |
| 14:05~<br>14:10 | 196 | 186 | 162 | 169 | 203 | 348 | 442 | 213 | 201 | 211 | 171 | 215 | 358 | 370 | 187 | 190 | 152 | 162 | 164 | 299 | 265 | 223 | 165 | 186 | 164 | 192 | 311 | 358 |
| 14:10~<br>14:15 | 185 | 169 | 155 | 149 | 188 | 377 | 409 | 238 | 187 | 202 | 207 | 193 | 393 | 353 | 163 | 225 | 161 | 185 | 214 | 312 | 280 | 192 | 215 | 170 | 207 | 209 | 361 | 387 |
| 14:15~<br>14:20 | 176 | 194 | 228 | 161 | 221 | 362 | 443 | 218 | 223 | 190 | 189 | 230 | 373 | 366 | 157 | 253 | 208 | 161 | 218 | 359 | 305 | 219 | 171 | 208 | 172 | 222 | 329 | 338 |
| 14:20~<br>14:25 | 193 | 162 | 160 | 175 | 172 | 350 | 451 | 200 | 206 | 218 | 157 | 224 | 323 | 379 | 199 | 200 | 185 | 170 | 174 | 369 | 302 | 226 | 150 | 196 | 181 | 206 | 291 | 345 |



|                 |     |     |     |     |     |     |     |     |     |     |     |     |     |     |     |     |     |     |     |     |     |     |     |     |     |     |     |     |
|-----------------|-----|-----|-----|-----|-----|-----|-----|-----|-----|-----|-----|-----|-----|-----|-----|-----|-----|-----|-----|-----|-----|-----|-----|-----|-----|-----|-----|-----|
| 14:25~<br>14:30 | 206 | 197 | 203 | 179 | 197 | 412 | 423 | 186 | 176 | 182 | 193 | 223 | 372 | 381 | 210 | 212 | 185 | 173 | 224 | 348 | 245 | 265 | 161 | 192 | 192 | 218 | 371 | 381 |
| 14:30~<br>14:35 | 170 | 204 | 184 | 167 | 189 | 363 | 447 | 192 | 187 | 170 | 201 | 184 | 326 | 330 | 234 | 192 | 171 | 157 | 238 | 339 | 277 | 216 | 181 | 207 | 162 | 247 | 352 | 347 |
| 14:35~<br>14:40 | 201 | 174 | 172 | 156 | 168 | 353 | 445 | 187 | 210 | 208 | 173 | 237 | 350 | 368 | 174 | 263 | 186 | 140 | 193 | 392 | 302 | 202 | 204 | 197 | 181 | 210 | 353 | 345 |
| 14:40~<br>14:45 | 207 | 172 | 138 | 186 | 200 | 368 | 449 | 220 | 184 | 195 | 163 | 227 | 364 | 345 | 187 | 196 | 191 | 166 | 203 | 409 | 310 | 205 | 194 | 214 | 160 | 232 | 330 | 321 |
| 14:45~<br>14:50 | 186 | 210 | 149 | 160 | 186 | 371 | 440 | 205 | 195 | 187 | 171 | 211 | 327 | 330 | 162 | 182 | 154 | 133 | 170 | 377 | 276 | 204 | 204 | 192 | 167 | 217 | 361 | 368 |
| 14:50~<br>14:55 | 212 | 185 | 194 | 185 | 171 | 385 | 452 | 201 | 194 | 194 | 188 | 176 | 397 | 379 | 163 | 238 | 181 | 171 | 212 | 373 | 263 | 188 | 198 | 191 | 153 | 221 | 349 | 353 |
| 14:55~<br>15:00 | 148 | 194 | 172 | 180 | 153 | 408 | 487 | 200 | 196 | 197 | 192 | 185 | 386 | 351 | 209 | 243 | 161 | 152 | 218 | 345 | 294 | 214 | 220 | 182 | 184 | 276 | 343 | 372 |
| 15:00~<br>15:05 | 200 | 223 | 171 | 177 | 175 | 438 | 448 | 176 | 171 | 197 | 190 | 233 | 337 | 391 | 168 | 199 | 149 | 183 | 229 | 391 | 311 | 166 | 185 | 206 | 199 | 216 | 353 | 397 |
| 15:05~<br>15:10 | 156 | 227 | 230 | 179 | 182 | 399 | 482 | 182 | 169 | 191 | 186 | 205 | 348 | 334 | 231 | 197 | 145 | 166 | 206 | 418 | 254 | 177 | 234 | 179 | 199 | 212 | 349 | 384 |
| 15:10~<br>15:15 | 230 | 202 | 209 | 189 | 181 | 438 | 440 | 210 | 189 | 181 | 227 | 226 | 402 | 399 | 209 | 182 | 181 | 192 | 228 | 330 | 274 | 228 | 192 | 214 | 213 | 227 | 347 | 339 |
| 15:15~<br>15:20 | 195 | 200 | 229 | 198 | 179 | 389 | 472 | 241 | 197 | 181 | 203 | 214 | 375 | 396 | 184 | 197 | 181 | 172 | 227 | 424 | 295 | 236 | 164 | 221 | 178 | 238 | 382 | 417 |
| 15:20~<br>15:25 | 195 | 192 | 230 | 203 | 206 | 478 | 462 | 218 | 191 | 189 | 179 | 229 | 392 | 422 | 234 | 196 | 187 | 176 | 216 | 417 | 329 | 226 | 197 | 172 | 197 | 237 | 392 | 438 |
| 15:25~<br>15:30 | 246 | 229 | 213 | 174 | 227 | 446 | 487 | 241 | 202 | 189 | 235 | 259 | 372 | 457 | 219 | 204 | 149 | 194 | 232 | 410 | 324 | 226 | 214 | 193 | 190 | 212 | 378 | 357 |

|                 |     |     |     |     |     |     |     |     |     |     |     |     |     |     |     |     |     |     |     |     |     |     |     |     |     |     |     |     |
|-----------------|-----|-----|-----|-----|-----|-----|-----|-----|-----|-----|-----|-----|-----|-----|-----|-----|-----|-----|-----|-----|-----|-----|-----|-----|-----|-----|-----|-----|
| 15:30~<br>15:35 | 233 | 183 | 224 | 174 | 210 | 455 | 438 | 213 | 237 | 212 | 229 | 217 | 430 | 427 | 215 | 276 | 216 | 158 | 229 | 387 | 291 | 244 | 194 | 178 | 203 | 250 | 364 | 316 |
| 15:35~<br>15:40 | 214 | 213 | 295 | 204 | 195 | 443 | 425 | 216 | 245 | 205 | 224 | 249 | 420 | 402 | 195 | 269 | 245 | 167 | 215 | 453 | 281 | 207 | 225 | 237 | 203 | 241 | 401 | 369 |
| 15:40~<br>15:45 | 217 | 177 | 203 | 200 | 206 | 424 | 478 | 212 | 220 | 202 | 202 | 230 | 368 | 399 | 241 | 196 | 216 | 155 | 228 | 414 | 285 | 241 | 231 | 248 | 208 | 242 | 390 | 419 |
| 15:45~<br>15:50 | 218 | 188 | 205 | 231 | 229 | 437 | 457 | 243 | 191 | 245 | 218 | 279 | 376 | 378 | 252 | 266 | 260 | 218 | 295 | 413 | 333 | 235 | 232 | 218 | 194 | 242 | 398 | 402 |
| 15:50~<br>15:55 | 206 | 169 | 203 | 224 | 222 | 413 | 478 | 245 | 224 | 208 | 271 | 257 | 442 | 425 | 217 | 232 | 226 | 198 | 262 | 426 | 327 | 267 | 225 | 230 | 210 | 245 | 399 | 432 |
| 15:55~<br>16:00 | 205 | 241 | 224 | 211 | 234 | 449 | 464 | 223 | 206 | 234 | 223 | 251 | 437 | 379 | 224 | 239 | 213 | 174 | 237 | 421 | 305 | 226 | 237 | 237 | 241 | 277 | 399 | 348 |
| 16:00~<br>16:05 | 197 | 231 | 221 | 225 | 207 | 410 | 472 | 249 | 238 | 206 | 241 | 247 | 421 | 400 | 251 | 250 | 194 | 208 | 243 | 458 | 287 | 217 | 239 | 237 | 214 | 255 | 427 | 452 |
| 16:05~<br>16:10 | 213 | 205 | 208 | 198 | 201 | 431 | 451 | 213 | 203 | 243 | 210 | 242 | 479 | 424 | 275 | 240 | 202 | 194 | 241 | 482 | 346 | 267 | 277 | 243 | 230 | 352 | 415 | 468 |
| 16:10~<br>16:15 | 217 | 199 | 174 | 203 | 267 | 398 | 453 | 223 | 234 | 220 | 211 | 238 | 484 | 422 | 269 | 234 | 194 | 200 | 241 | 499 | 324 | 285 | 235 | 252 | 220 | 279 | 396 | 380 |
| 16:15~<br>16:20 | 220 | 208 | 219 | 213 | 232 | 425 | 489 | 232 | 249 | 244 | 216 | 229 | 429 | 411 | 271 | 252 | 188 | 222 | 278 | 443 | 323 | 221 | 273 | 226 | 249 | 289 | 416 | 421 |
| 16:20~<br>16:25 | 225 | 240 | 264 | 205 | 268 | 405 | 533 | 223 | 225 | 218 | 270 | 258 | 474 | 403 | 261 | 237 | 272 | 237 | 253 | 479 | 336 | 214 | 248 | 248 | 264 | 270 | 421 | 421 |
| 16:25~<br>16:30 | 233 | 203 | 216 | 223 | 255 | 450 | 494 | 289 | 218 | 251 | 236 | 213 | 430 | 405 | 276 | 284 | 206 | 237 | 307 | 484 | 334 | 263 | 231 | 235 | 244 | 330 | 384 | 427 |
| 16:30~<br>16:35 | 287 | 286 | 261 | 283 | 312 | 462 | 446 | 260 | 263 | 221 | 220 | 249 | 431 | 444 | 255 | 269 | 209 | 244 | 319 | 417 | 342 | 280 | 334 | 253 | 276 | 338 | 438 | 456 |

|                 |     |     |     |     |     |     |     |     |     |     |     |     |     |     |     |     |     |     |     |     |     |     |     |     |     |     |     |     |
|-----------------|-----|-----|-----|-----|-----|-----|-----|-----|-----|-----|-----|-----|-----|-----|-----|-----|-----|-----|-----|-----|-----|-----|-----|-----|-----|-----|-----|-----|
| 16:35~<br>16:40 | 267 | 273 | 281 | 250 | 284 | 428 | 440 | 252 | 306 | 296 | 233 | 257 | 455 | 393 | 289 | 261 | 255 | 274 | 346 | 474 | 326 | 288 | 315 | 240 | 268 | 381 | 402 | 423 |
| 16:40~<br>16:45 | 273 | 262 | 245 | 267 | 258 | 481 | 469 | 271 | 259 | 234 | 216 | 244 | 420 | 394 | 269 | 296 | 263 | 225 | 328 | 481 | 307 | 300 | 287 | 256 | 234 | 337 | 410 | 364 |
| 16:45~<br>16:50 | 222 | 254 | 290 | 257 | 280 | 487 | 517 | 250 | 262 | 263 | 280 | 265 | 457 | 418 | 321 | 277 | 221 | 221 | 337 | 457 | 297 | 285 | 246 | 235 | 270 | 390 | 444 | 405 |
| 16:50~<br>16:55 | 224 | 271 | 244 | 237 | 276 | 463 | 472 | 279 | 254 | 235 | 292 | 331 | 486 | 464 | 272 | 281 | 262 | 227 | 326 | 426 | 371 | 298 | 272 | 245 | 268 | 338 | 456 | 392 |
| 16:55~<br>17:00 | 233 | 295 | 261 | 245 | 271 | 404 | 503 | 284 | 295 | 275 | 258 | 277 | 512 | 430 | 272 | 248 | 230 | 240 | 322 | 513 | 318 | 267 | 240 | 237 | 249 | 295 | 476 | 393 |
| 17:00~<br>17:05 | 236 | 260 | 270 | 263 | 292 | 448 | 469 | 270 | 278 | 320 | 224 | 317 | 444 | 428 | 304 | 322 | 287 | 235 | 297 | 439 | 357 | 313 | 301 | 307 | 287 | 406 | 420 | 404 |
| 17:05~<br>17:10 | 323 | 315 | 326 | 281 | 324 | 433 | 522 | 329 | 291 | 333 | 307 | 304 | 525 | 386 | 349 | 352 | 321 | 259 | 358 | 451 | 346 | 340 | 328 | 348 | 329 | 342 | 402 | 379 |
| 17:10~<br>17:15 | 351 | 350 | 373 | 350 | 389 | 442 | 517 | 350 | 326 | 382 | 375 | 405 | 438 | 517 | 363 | 378 | 349 | 310 | 397 | 487 | 353 | 379 | 376 | 310 | 355 | 422 | 430 | 420 |
| 17:15~<br>17:20 | 327 | 312 | 326 | 334 | 379 | 406 | 524 | 372 | 354 | 346 | 337 | 381 | 457 | 452 | 325 | 316 | 343 | 337 | 377 | 561 | 292 | 329 | 338 | 372 | 349 | 447 | 475 | 391 |
| 17:20~<br>17:25 | 353 | 321 | 332 | 297 | 331 | 456 | 509 | 324 | 342 | 348 | 355 | 334 | 516 | 467 | 357 | 366 | 347 | 311 | 444 | 506 | 298 | 338 | 363 | 324 | 341 | 385 | 429 | 369 |
| 17:25~<br>17:30 | 339 | 327 | 341 | 341 | 335 | 442 | 506 | 365 | 352 | 400 | 334 | 416 | 501 | 405 | 388 | 341 | 360 | 299 | 435 | 450 | 321 | 351 | 346 | 340 | 333 | 441 | 473 | 391 |
| 17:30~<br>17:35 | 383 | 364 | 385 | 384 | 389 | 455 | 462 | 359 | 365 | 407 | 356 | 396 | 521 | 437 | 394 | 376 | 328 | 343 | 434 | 505 | 283 | 372 | 401 | 387 | 406 | 468 | 438 | 340 |
| 17:35~<br>17:40 | 457 | 510 | 525 | 511 | 477 | 475 | 433 | 542 | 552 | 554 | 543 | 537 | 478 | 399 | 553 | 543 | 517 | 453 | 559 | 552 | 277 | 545 | 502 | 464 | 515 | 527 | 386 | 376 |

|                 |     |     |     |     |     |     |     |     |     |     |     |     |     |     |     |     |     |     |     |     |     |     |     |     |     |     |     |     |
|-----------------|-----|-----|-----|-----|-----|-----|-----|-----|-----|-----|-----|-----|-----|-----|-----|-----|-----|-----|-----|-----|-----|-----|-----|-----|-----|-----|-----|-----|
| 17:40~<br>17:45 | 605 | 599 | 665 | 600 | 633 | 462 | 461 | 630 | 621 | 566 | 602 | 663 | 489 | 441 | 628 | 580 | 593 | 573 | 609 | 488 | 346 | 521 | 586 | 625 | 608 | 625 | 432 | 387 |
| 17:45~<br>17:50 | 536 | 559 | 534 | 592 | 641 | 427 | 444 | 553 | 490 | 593 | 550 | 569 | 459 | 409 | 598 | 562 | 556 | 472 | 599 | 568 | 291 | 563 | 538 | 514 | 513 | 612 | 394 | 430 |
| 17:50~<br>17:55 | 481 | 443 | 499 | 444 | 567 | 370 | 427 | 466 | 443 | 462 | 483 | 527 | 446 | 345 | 489 | 477 | 495 | 467 | 515 | 438 | 302 | 514 | 492 | 475 | 485 | 546 | 390 | 317 |
| 17:55~<br>18:00 | 463 | 432 | 468 | 430 | 476 | 391 | 406 | 416 | 448 | 447 | 438 | 459 | 399 | 373 | 466 | 413 | 434 | 393 | 524 | 452 | 279 | 465 | 448 | 423 | 434 | 451 | 377 | 335 |
| 18:00~<br>18:05 | 438 | 401 | 448 | 406 | 436 | 404 | 386 | 387 | 388 | 409 | 373 | 422 | 423 | 400 | 407 | 417 | 342 | 374 | 454 | 429 | 277 | 408 | 383 | 439 | 441 | 550 | 363 | 344 |
| 18:05~<br>18:10 | 423 | 371 | 426 | 368 | 439 | 371 | 427 | 396 | 394 | 385 | 400 | 441 | 484 | 373 | 437 | 413 | 368 | 394 | 465 | 371 | 249 | 403 | 395 | 360 | 432 | 442 | 368 | 309 |
| 18:10~<br>18:15 | 434 | 406 | 381 | 359 | 440 | 401 | 402 | 367 | 415 | 355 | 383 | 396 | 410 | 335 | 332 | 412 | 372 | 399 | 403 | 474 | 243 | 394 | 376 | 388 | 358 | 437 | 392 | 310 |
| 18:15~<br>18:20 | 335 | 340 | 340 | 308 | 409 | 404 | 363 | 360 | 344 | 372 | 299 | 361 | 474 | 339 | 371 | 315 | 382 | 342 | 380 | 413 | 228 | 384 | 374 | 366 | 317 | 392 | 393 | 292 |
| 18:20~<br>18:25 | 311 | 319 | 331 | 286 | 356 | 384 | 403 | 318 | 304 | 306 | 280 | 408 | 453 | 331 | 314 | 363 | 308 | 329 | 337 | 410 | 247 | 276 | 314 | 319 | 304 | 406 | 297 | 304 |
| 18:25~<br>18:30 | 285 | 298 | 295 | 273 | 342 | 306 | 366 | 253 | 285 | 236 | 266 | 337 | 460 | 320 | 279 | 284 | 305 | 242 | 345 | 396 | 205 | 291 | 256 | 296 | 272 | 314 | 315 | 285 |
| 18:30~<br>18:35 | 239 | 261 | 242 | 280 | 309 | 358 | 362 | 247 | 273 | 278 | 286 | 317 | 408 | 274 | 241 | 237 | 254 | 221 | 292 | 405 | 193 | 272 | 240 | 213 | 255 | 334 | 315 | 269 |
| 18:35~<br>18:40 | 218 | 227 | 250 | 220 | 339 | 279 | 315 | 185 | 218 | 242 | 263 | 325 | 367 | 296 | 249 | 217 | 195 | 185 | 282 | 371 | 207 | 226 | 243 | 259 | 224 | 307 | 319 | 218 |
| 18:40~<br>18:45 | 206 | 248 | 223 | 203 | 265 | 338 | 337 | 217 | 244 | 191 | 214 | 319 | 430 | 264 | 194 | 251 | 186 | 217 | 266 | 404 | 211 | 231 | 251 | 237 | 221 | 282 | 320 | 236 |

|                 |     |     |     |     |     |     |     |     |     |     |     |     |     |     |     |     |     |     |     |     |     |     |     |     |     |     |     |     |
|-----------------|-----|-----|-----|-----|-----|-----|-----|-----|-----|-----|-----|-----|-----|-----|-----|-----|-----|-----|-----|-----|-----|-----|-----|-----|-----|-----|-----|-----|
| 18:45~<br>18:50 | 230 | 198 | 219 | 190 | 245 | 321 | 302 | 194 | 189 | 221 | 205 | 279 | 380 | 307 | 247 | 181 | 218 | 236 | 267 | 354 | 173 | 173 | 235 | 209 | 208 | 291 | 288 | 243 |
| 18:50~<br>18:55 | 176 | 233 | 208 | 196 | 277 | 288 | 354 | 180 | 207 | 182 | 187 | 287 | 320 | 275 | 184 | 196 | 165 | 212 | 289 | 365 | 191 | 157 | 212 | 175 | 172 | 238 | 283 | 275 |
| 18:55~<br>19:00 | 166 | 149 | 169 | 205 | 252 | 290 | 285 | 160 | 162 | 204 | 183 | 198 | 360 | 285 | 182 | 186 | 183 | 192 | 226 | 362 | 209 | 208 | 168 | 160 | 180 | 203 | 270 | 270 |
| 19:00~<br>19:05 | 198 | 211 | 163 | 172 | 245 | 326 | 301 | 180 | 186 | 184 | 168 | 260 | 324 | 231 | 194 | 187 | 166 | 191 | 261 | 336 | 204 | 165 | 186 | 181 | 200 | 263 | 304 | 272 |
| 19:05~<br>19:10 | 159 | 185 | 180 | 176 | 240 | 283 | 342 | 167 | 158 | 188 | 178 | 205 | 320 | 273 | 206 | 162 | 145 | 168 | 230 | 324 | 203 | 161 | 147 | 179 | 154 | 223 | 289 | 242 |
| 19:10~<br>19:15 | 154 | 154 | 154 | 146 | 198 | 298 | 368 | 169 | 157 | 192 | 176 | 219 | 371 | 228 | 169 | 144 | 124 | 166 | 264 | 339 | 219 | 158 | 168 | 176 | 159 | 180 | 289 | 237 |
| 19:15~<br>19:20 | 143 | 144 | 170 | 171 | 253 | 291 | 353 | 175 | 135 | 191 | 191 | 190 | 326 | 257 | 176 | 150 | 147 | 155 | 232 | 291 | 169 | 187 | 178 | 204 | 172 | 240 | 283 | 229 |
| 19:20~<br>19:25 | 144 | 153 | 138 | 162 | 188 | 318 | 332 | 171 | 134 | 178 | 171 | 202 | 322 | 215 | 159 | 145 | 134 | 141 | 225 | 282 | 156 | 155 | 163 | 165 | 137 | 269 | 278 | 211 |
| 19:25~<br>19:30 | 145 | 153 | 138 | 158 | 172 | 341 | 295 | 171 | 149 | 170 | 166 | 194 | 316 | 201 | 168 | 179 | 111 | 137 | 171 | 323 | 139 | 171 | 145 | 145 | 146 | 230 | 301 | 236 |
| 19:30~<br>19:35 | 161 | 153 | 156 | 119 | 168 | 316 | 282 | 169 | 156 | 142 | 149 | 204 | 275 | 257 | 155 | 162 | 143 | 120 | 217 | 245 | 183 | 166 | 145 | 142 | 145 | 265 | 266 | 239 |
| 19:35~<br>19:40 | 147 | 145 | 150 | 140 | 225 | 306 | 279 | 177 | 136 | 125 | 139 | 210 | 313 | 235 | 154 | 128 | 156 | 118 | 199 | 317 | 176 | 190 | 172 | 156 | 161 | 202 | 259 | 182 |
| 19:40~<br>19:45 | 147 | 188 | 155 | 136 | 183 | 282 | 308 | 152 | 129 | 160 | 157 | 195 | 320 | 203 | 154 | 186 | 141 | 101 | 234 | 259 | 143 | 153 | 196 | 154 | 141 | 228 | 239 | 220 |
| 19:45~<br>19:50 | 168 | 148 | 208 | 131 | 195 | 303 | 266 | 134 | 166 | 142 | 153 | 171 | 337 | 203 | 177 | 153 | 143 | 108 | 201 | 317 | 164 | 159 | 188 | 180 | 146 | 261 | 269 | 189 |

|                 |     |     |     |     |     |     |     |     |     |     |     |     |     |     |     |     |     |     |     |     |     |     |     |     |     |     |     |     |
|-----------------|-----|-----|-----|-----|-----|-----|-----|-----|-----|-----|-----|-----|-----|-----|-----|-----|-----|-----|-----|-----|-----|-----|-----|-----|-----|-----|-----|-----|
| 19:50~<br>19:55 | 157 | 145 | 158 | 145 | 152 | 294 | 254 | 149 | 124 | 163 | 163 | 194 | 318 | 198 | 167 | 168 | 152 | 108 | 246 | 308 | 168 | 133 | 145 | 130 | 185 | 262 | 298 | 233 |
| 19:55~<br>20:00 | 144 | 176 | 132 | 121 | 149 | 283 | 291 | 138 | 133 | 145 | 141 | 164 | 365 | 235 | 115 | 156 | 118 | 110 | 239 | 312 | 137 | 172 | 154 | 140 | 159 | 211 | 269 | 236 |
| 20:00~<br>20:05 | 184 | 159 | 137 | 119 | 207 | 264 | 287 | 199 | 179 | 149 | 183 | 211 | 384 | 219 | 190 | 153 | 130 | 111 | 293 | 317 | 174 | 138 | 159 | 173 | 169 | 254 | 244 | 205 |
| 20:05~<br>20:10 | 140 | 178 | 162 | 189 | 164 | 314 | 308 | 144 | 150 | 153 | 153 | 157 | 317 | 262 | 156 | 178 | 137 | 107 | 273 | 395 | 168 | 147 | 170 | 175 | 160 | 221 | 260 | 217 |
| 20:10~<br>20:15 | 137 | 183 | 190 | 146 | 168 | 341 | 286 | 155 | 188 | 174 | 175 | 182 | 325 | 224 | 184 | 157 | 119 | 91  | 239 | 330 | 191 | 142 | 203 | 194 | 165 | 224 | 311 | 170 |
| 20:15~<br>20:20 | 165 | 181 | 126 | 174 | 155 | 340 | 243 | 170 | 185 | 162 | 186 | 178 | 327 | 239 | 164 | 181 | 142 | 116 | 272 | 364 | 193 | 184 | 152 | 165 | 178 | 264 | 258 | 257 |
| 20:20~<br>20:25 | 143 | 165 | 200 | 129 | 177 | 304 | 297 | 166 | 186 | 184 | 174 | 186 | 364 | 261 | 175 | 169 | 102 | 140 | 280 | 389 | 164 | 181 | 177 | 156 | 162 | 215 | 256 | 251 |
| 20:25~<br>20:30 | 144 | 195 | 145 | 159 | 166 | 315 | 262 | 132 | 186 | 169 | 175 | 197 | 362 | 258 | 151 | 158 | 152 | 122 | 299 | 336 | 173 | 148 | 161 | 195 | 181 | 232 | 312 | 202 |
| 20:30~<br>20:35 | 192 | 180 | 184 | 114 | 158 | 354 | 282 | 183 | 186 | 170 | 153 | 205 | 372 | 275 | 146 | 181 | 147 | 130 | 320 | 335 | 166 | 197 | 149 | 170 | 176 | 234 | 314 | 204 |
| 20:35~<br>20:40 | 212 | 168 | 179 | 159 | 162 | 288 | 311 | 178 | 177 | 173 | 164 | 179 | 421 | 238 | 164 | 191 | 152 | 94  | 305 | 328 | 148 | 201 | 180 | 159 | 189 | 248 | 309 | 237 |
| 20:40~<br>20:45 | 165 | 181 | 141 | 144 | 182 | 262 | 309 | 177 | 141 | 183 | 177 | 234 | 342 | 202 | 179 | 184 | 127 | 134 | 272 | 329 | 168 | 157 | 168 | 163 | 199 | 271 | 298 | 244 |
| 20:45~<br>20:50 | 170 | 175 | 156 | 132 | 173 | 245 | 263 | 209 | 171 | 181 | 175 | 215 | 358 | 221 | 180 | 196 | 174 | 116 | 244 | 377 | 128 | 160 | 170 | 165 | 151 | 259 | 280 | 199 |
| 20:50~<br>20:55 | 179 | 187 | 182 | 121 | 164 | 304 | 273 | 173 | 175 | 145 | 206 | 217 | 347 | 209 | 139 | 189 | 146 | 120 | 301 | 370 | 160 | 155 | 160 | 163 | 149 | 213 | 257 | 173 |

|                 |     |     |     |     |     |     |     |     |     |     |     |     |     |     |     |     |     |     |     |     |     |     |     |     |     |     |     |     |
|-----------------|-----|-----|-----|-----|-----|-----|-----|-----|-----|-----|-----|-----|-----|-----|-----|-----|-----|-----|-----|-----|-----|-----|-----|-----|-----|-----|-----|-----|
| 20:55~<br>21:00 | 176 | 169 | 197 | 126 | 206 | 254 | 276 | 179 | 183 | 182 | 150 | 259 | 381 | 218 | 189 | 184 | 166 | 98  | 302 | 317 | 176 | 178 | 155 | 157 | 185 | 255 | 241 | 150 |
| 21:00~<br>21:05 | 160 | 151 | 169 | 116 | 189 | 310 | 288 | 187 | 198 | 185 | 171 | 240 | 341 | 220 | 145 | 178 | 111 | 108 | 277 | 318 | 158 | 144 | 155 | 196 | 183 | 232 | 244 | 147 |
| 21:05~<br>21:10 | 160 | 160 | 203 | 148 | 208 | 270 | 310 | 186 | 184 | 148 | 181 | 218 | 295 | 211 | 169 | 199 | 168 | 126 | 307 | 318 | 179 | 143 | 141 | 164 | 191 | 327 | 235 | 171 |
| 21:10~<br>21:15 | 179 | 221 | 185 | 145 | 214 | 282 | 280 | 180 | 174 | 185 | 208 | 255 | 323 | 186 | 218 | 213 | 134 | 136 | 342 | 321 | 148 | 209 | 156 | 133 | 164 | 294 | 260 | 191 |
| 21:15~<br>21:20 | 162 | 188 | 170 | 114 | 271 | 245 | 275 | 222 | 186 | 198 | 191 | 214 | 297 | 228 | 177 | 178 | 126 | 137 | 295 | 356 | 160 | 145 | 175 | 163 | 203 | 271 | 241 | 203 |
| 21:20~<br>21:25 | 131 | 136 | 156 | 139 | 209 | 303 | 262 | 182 | 153 | 129 | 148 | 202 | 339 | 193 | 165 | 190 | 119 | 101 | 227 | 336 | 122 | 148 | 163 | 175 | 211 | 233 | 272 | 171 |
| 21:25~<br>21:30 | 130 | 180 | 179 | 132 | 204 | 292 | 266 | 172 | 147 | 145 | 128 | 208 | 318 | 201 | 129 | 130 | 129 | 104 | 300 | 288 | 118 | 142 | 157 | 154 | 168 | 224 | 205 | 168 |
| 21:30~<br>21:35 | 117 | 157 | 154 | 110 | 187 | 235 | 222 | 155 | 162 | 169 | 133 | 172 | 291 | 166 | 142 | 159 | 128 | 92  | 295 | 304 | 120 | 131 | 154 | 136 | 150 | 253 | 220 | 142 |
| 21:35~<br>21:40 | 110 | 124 | 164 | 103 | 228 | 269 | 235 | 142 | 119 | 148 | 124 | 218 | 292 | 171 | 131 | 155 | 100 | 95  | 209 | 288 | 98  | 146 | 123 | 139 | 160 | 202 | 225 | 154 |
| 21:40~<br>21:45 | 143 | 120 | 176 | 92  | 153 | 306 | 214 | 93  | 108 | 145 | 147 | 178 | 286 | 172 | 96  | 97  | 100 | 75  | 253 | 266 | 92  | 109 | 127 | 174 | 145 | 192 | 214 | 168 |
| 21:45~<br>21:50 | 100 | 102 | 122 | 84  | 172 | 227 | 183 | 96  | 133 | 104 | 135 | 171 | 212 | 148 | 130 | 130 | 98  | 111 | 236 | 304 | 147 | 110 | 90  | 117 | 133 | 230 | 154 | 116 |
| 21:50~<br>21:55 | 117 | 99  | 115 | 87  | 179 | 209 | 179 | 112 | 115 | 94  | 146 | 167 | 272 | 142 | 151 | 90  | 93  | 76  | 208 | 207 | 82  | 115 | 111 | 123 | 154 | 256 | 146 | 134 |
| 21:55~<br>22:00 | 102 | 101 | 104 | 83  | 114 | 179 | 164 | 99  | 135 | 84  | 92  | 157 | 229 | 121 | 124 | 103 | 94  | 77  | 195 | 220 | 95  | 99  | 98  | 118 | 130 | 217 | 133 | 95  |





|                          | 3/12 | 3/13 | 3/14 | 3/15 | 3/16 | 3/17 | 3/18 | 3/19 | 3/20 | 3/21 | 3/22 | 3/23 | 3/24 | 3/25 | 3/26 | 3/27 | 3/28 | 3/29 | 3/30 | 3/31 | /4/1 | /4/2 | /4/3 | /4/4 | /4/5 | /4/6 | /4/7 | /4/8 |
|--------------------------|------|------|------|------|------|------|------|------|------|------|------|------|------|------|------|------|------|------|------|------|------|------|------|------|------|------|------|------|
| 6:00 <sup>6</sup><br>:05 | 17   | 10   | 11   | 16   | 12   | 15   | 10   | 11   | 10   | 14   | 8    | 10   | 15   | 11   | 7    | 13   | 13   | 12   | 10   | 17   | 28   | 49   | 18   | 26   | 14   | 21   | 16   | 15   |
| 6:05 <sup>6</sup><br>:10 | 19   | 6    | 6    | 14   | 12   | 16   | 15   | 22   | 14   | 10   | 7    | 8    | 18   | 17   | 18   | 14   | 15   | 12   | 16   | 17   | 16   | 50   | 25   | 25   | 17   | 18   | 10   | 10   |
| 6:10 <sup>6</sup><br>:15 | 12   | 9    | 12   | 12   | 6    | 14   | 7    | 17   | 16   | 7    | 15   | 10   | 20   | 21   | 21   | 24   | 25   | 16   | 17   | 17   | 25   | 35   | 18   | 21   | 34   | 19   | 20   | 21   |
| 6:15 <sup>6</sup><br>:20 | 13   | 11   | 12   | 15   | 16   | 29   | 16   | 22   | 18   | 14   | 12   | 14   | 17   | 20   | 26   | 20   | 16   | 24   | 13   | 12   | 26   | 57   | 29   | 17   | 30   | 14   | 21   | 10   |
| 6:20 <sup>6</sup><br>:25 | 44   | 21   | 30   | 18   | 25   | 28   | 36   | 26   | 29   | 25   | 19   | 13   | 33   | 36   | 44   | 31   | 27   | 25   | 24   | 26   | 35   | 53   | 53   | 31   | 37   | 27   | 25   | 18   |
| 6:25 <sup>6</sup><br>:30 | 43   | 35   | 35   | 30   | 24   | 18   | 16   | 42   | 42   | 16   | 29   | 21   | 44   | 42   | 36   | 37   | 45   | 28   | 38   | 25   | 50   | 52   | 38   | 17   | 42   | 35   | 40   | 24   |
| 6:30 <sup>6</sup><br>:35 | 38   | 28   | 31   | 35   | 33   | 38   | 30   | 36   | 26   | 25   | 35   | 20   | 40   | 35   | 44   | 40   | 32   | 47   | 45   | 27   | 43   | 36   | 41   | 45   | 51   | 45   | 40   | 19   |
| 6:35 <sup>6</sup><br>:40 | 53   | 41   | 48   | 45   | 38   | 48   | 29   | 43   | 32   | 33   | 40   | 25   | 65   | 42   | 43   | 51   | 50   | 49   | 40   | 23   | 30   | 57   | 47   | 20   | 55   | 47   | 29   | 43   |
| 6:40 <sup>6</sup><br>:45 | 38   | 52   | 38   | 45   | 49   | 43   | 40   | 46   | 57   | 37   | 46   | 38   | 54   | 40   | 50   | 59   | 40   | 39   | 50   | 41   | 65   | 77   | 56   | 39   | 66   | 54   | 40   | 47   |
| 6:45 <sup>6</sup><br>:50 | 59   | 63   | 68   | 72   | 65   | 35   | 25   | 52   | 69   | 32   | 61   | 37   | 71   | 45   | 76   | 69   | 76   | 71   | 59   | 68   | 55   | 58   | 26   | 38   | 79   | 59   | 33   | 46   |
| 6:50 <sup>6</sup><br>:55 | 78   | 68   | 86   | 61   | 67   | 44   | 39   | 75   | 79   | 60   | 56   | 43   | 56   | 61   | 88   | 75   | 68   | 73   | 71   | 64   | 82   | 49   | 51   | 56   | 78   | 84   | 68   | 46   |
| 6:55 <sup>7</sup><br>:00 | 94   | 90   | 108  | 108  | 76   | 43   | 38   | 84   | 68   | 74   | 66   | 54   | 67   | 49   | 92   | 86   | 103  | 87   | 92   | 74   | 97   | 80   | 63   | 41   | 80   | 84   | 56   | 46   |
| 7:00 <sup>7</sup>        | 97   | 99   | 79   | 76   | 87   | 47   | 37   | 80   | 100  | 79   | 90   | 76   | 67   | 48   | 93   | 115  | 105  | 92   | 71   | 72   | 86   | 80   | 67   | 40   | 95   | 78   | 60   | 39   |



|           |     |     |     |     |     |     |     |     |     |     |     |     |     |     |     |     |     |     |     |     |     |     |     |     |     |     |     |     |  |  |  |
|-----------|-----|-----|-----|-----|-----|-----|-----|-----|-----|-----|-----|-----|-----|-----|-----|-----|-----|-----|-----|-----|-----|-----|-----|-----|-----|-----|-----|-----|--|--|--|
| :10       |     |     |     |     |     |     |     |     |     |     |     |     |     |     |     |     |     |     |     |     |     |     |     |     |     |     |     |     |  |  |  |
| 8:10~8:15 | 174 | 223 | 172 | 199 | 193 | 125 | 100 | 192 | 220 | 169 | 209 | 184 | 129 | 52  | 168 | 180 | 200 | 193 | 207 | 146 | 214 | 145 | 122 | 97  | 186 | 160 | 102 | 85  |  |  |  |
| 8:15~8:20 | 186 | 162 | 202 | 230 | 177 | 99  | 119 | 221 | 228 | 162 | 198 | 151 | 126 | 73  | 226 | 210 | 172 | 171 | 189 | 189 | 184 | 127 | 129 | 96  | 212 | 183 | 127 | 93  |  |  |  |
| 8:20~8:25 | 182 | 202 | 186 | 181 | 198 | 86  | 105 | 163 | 175 | 139 | 185 | 169 | 112 | 140 | 206 | 163 | 205 | 160 | 195 | 156 | 179 | 141 | 129 | 116 | 163 | 201 | 122 | 100 |  |  |  |
| 8:25~8:30 | 191 | 182 | 181 | 181 | 206 | 90  | 102 | 170 | 191 | 158 | 182 | 145 | 136 | 100 | 195 | 222 | 172 | 202 | 204 | 132 | 161 | 151 | 116 | 106 | 190 | 168 | 127 | 83  |  |  |  |
| 8:30~8:35 | 172 | 179 | 179 | 174 | 153 | 128 | 110 | 164 | 154 | 137 | 171 | 139 | 210 | 132 | 165 | 157 | 177 | 147 | 176 | 124 | 149 | 132 | 99  | 77  | 154 | 140 | 101 | 107 |  |  |  |
| 8:35~8:40 | 156 | 151 | 170 | 163 | 166 | 126 | 117 | 172 | 148 | 130 | 160 | 121 | 156 | 106 | 154 | 160 | 158 | 180 | 173 | 133 | 177 | 151 | 158 | 116 | 128 | 147 | 139 | 110 |  |  |  |
| 8:40~8:45 | 163 | 164 | 128 | 151 | 139 | 112 | 113 | 184 | 144 | 95  | 154 | 119 | 128 | 117 | 174 | 155 | 171 | 139 | 140 | 113 | 147 | 169 | 151 | 121 | 137 | 138 | 136 | 95  |  |  |  |
| 8:45~8:50 | 138 | 134 | 135 | 163 | 144 | 104 | 115 | 139 | 146 | 121 | 152 | 129 | 123 | 82  | 143 | 142 | 126 | 131 | 145 | 89  | 144 | 151 | 142 | 125 | 119 | 158 | 139 | 97  |  |  |  |
| 8:50~8:55 | 120 | 130 | 156 | 140 | 120 | 103 | 99  | 127 | 117 | 108 | 123 | 113 | 134 | 126 | 147 | 131 | 148 | 146 | 153 | 125 | 138 | 160 | 134 | 111 | 113 | 137 | 117 | 86  |  |  |  |
| 8:55~9:00 | 116 | 129 | 132 | 102 | 127 | 127 | 96  | 121 | 133 | 120 | 148 | 135 | 146 | 98  | 121 | 122 | 136 | 109 | 131 | 108 | 139 | 170 | 138 | 128 | 115 | 131 | 140 | 109 |  |  |  |
| 9:00~9:05 | 134 | 117 | 153 | 136 | 113 | 122 | 98  | 121 | 128 | 101 | 102 | 130 | 134 | 117 | 153 | 145 | 130 | 109 | 136 | 101 | 115 | 120 | 119 | 132 | 119 | 105 | 143 | 111 |  |  |  |
| 9:05~9:10 | 141 | 138 | 105 | 137 | 119 | 110 | 131 | 125 | 112 | 134 | 104 | 96  | 125 | 127 | 109 | 134 | 133 | 106 | 122 | 89  | 131 | 143 | 131 | 116 | 132 | 141 | 124 | 111 |  |  |  |
| 9:10~9    | 96  | 124 | 117 | 112 | 115 | 144 | 136 | 104 | 127 | 135 | 112 | 121 | 111 | 101 | 135 | 138 | 132 | 101 | 103 | 78  | 126 | 121 | 153 | 125 | 147 | 95  | 149 | 117 |  |  |  |

|             |     |     |     |     |     |     |     |     |     |     |     |     |     |     |     |     |     |     |     |    |     |     |     |     |     |     |     |     |
|-------------|-----|-----|-----|-----|-----|-----|-----|-----|-----|-----|-----|-----|-----|-----|-----|-----|-----|-----|-----|----|-----|-----|-----|-----|-----|-----|-----|-----|
| :15         |     |     |     |     |     |     |     |     |     |     |     |     |     |     |     |     |     |     |     |    |     |     |     |     |     |     |     |     |
| 9:15~9:20   | 110 | 137 | 146 | 150 | 128 | 126 | 94  | 122 | 131 | 167 | 139 | 151 | 136 | 124 | 134 | 140 | 126 | 120 | 117 | 93 | 148 | 142 | 122 | 115 | 127 | 119 | 136 | 115 |
| 9:20~9:25   | 133 | 103 | 97  | 122 | 101 | 156 | 107 | 104 | 136 | 127 | 151 | 143 | 192 | 122 | 127 | 121 | 144 | 128 | 97  | 83 | 96  | 162 | 199 | 100 | 92  | 131 | 119 | 117 |
| 9:25~9:30   | 141 | 116 | 119 | 119 | 109 | 128 | 102 | 119 | 112 | 117 | 115 | 147 | 133 | 119 | 161 | 126 | 144 | 149 | 130 | 87 | 124 | 173 | 159 | 109 | 108 | 141 | 136 | 96  |
| 9:30~9:35   | 102 | 118 | 140 | 128 | 122 | 126 | 132 | 123 | 128 | 109 | 107 | 145 | 176 | 129 | 108 | 107 | 122 | 119 | 100 | 80 | 125 | 162 | 188 | 121 | 133 | 135 | 119 | 133 |
| 9:35~9:40   | 122 | 120 | 124 | 114 | 131 | 120 | 121 | 94  | 118 | 146 | 111 | 143 | 133 | 154 | 159 | 151 | 143 | 151 | 106 | 97 | 124 | 190 | 153 | 139 | 127 | 150 | 134 | 103 |
| 9:40~9:45   | 118 | 124 | 138 | 100 | 123 | 156 | 146 | 134 | 115 | 143 | 121 | 130 | 103 | 125 | 104 | 127 | 137 | 131 | 130 | 80 | 131 | 169 | 156 | 162 | 135 | 147 | 142 | 109 |
| 9:45~9:50   | 131 | 101 | 134 | 126 | 124 | 104 | 150 | 123 | 119 | 118 | 108 | 131 | 141 | 164 | 103 | 148 | 143 | 131 | 117 | 96 | 126 | 162 | 146 | 122 | 96  | 118 | 144 | 131 |
| 9:50~9:55   | 115 | 122 | 113 | 119 | 146 | 176 | 133 | 116 | 137 | 120 | 110 | 121 | 153 | 168 | 153 | 136 | 136 | 120 | 104 | 92 | 123 | 187 | 153 | 180 | 134 | 102 | 154 | 127 |
| 9:55~10:00  | 109 | 134 | 87  | 122 | 139 | 151 | 135 | 103 | 107 | 129 | 115 | 174 | 163 | 143 | 119 | 148 | 125 | 127 | 116 | 98 | 134 | 161 | 160 | 135 | 101 | 122 | 127 | 106 |
| 10:00~10:05 | 132 | 139 | 123 | 127 | 117 | 161 | 127 | 114 | 136 | 137 | 114 | 119 | 133 | 147 | 130 | 132 | 166 | 124 | 133 | 93 | 149 | 180 | 150 | 171 | 113 | 145 | 137 | 131 |
| 10:05~10:10 | 135 | 139 | 135 | 166 | 153 | 151 | 147 | 138 | 125 | 168 | 98  | 148 | 176 | 149 | 115 | 179 | 138 | 134 | 126 | 82 | 97  | 151 | 152 | 148 | 159 | 147 | 123 | 153 |
| 10:10~10:15 | 140 | 138 | 144 | 168 | 142 | 146 | 139 | 124 | 136 | 171 | 120 | 136 | 153 | 164 | 129 | 178 | 162 | 152 | 130 | 92 | 180 | 199 | 154 | 142 | 132 | 161 | 138 | 150 |
| 10:15~      | 129 | 140 | 148 | 158 | 127 | 149 | 170 | 144 | 141 | 157 | 119 | 128 | 163 | 177 | 136 | 125 | 152 | 132 | 159 | 82 | 160 | 170 | 155 | 148 | 136 | 135 | 148 | 148 |

|                 |     |     |     |     |     |     |     |     |     |     |     |     |     |     |     |     |     |     |     |     |     |     |     |     |     |     |     |     |  |  |
|-----------------|-----|-----|-----|-----|-----|-----|-----|-----|-----|-----|-----|-----|-----|-----|-----|-----|-----|-----|-----|-----|-----|-----|-----|-----|-----|-----|-----|-----|--|--|
| 10:20           |     |     |     |     |     |     |     |     |     |     |     |     |     |     |     |     |     |     |     |     |     |     |     |     |     |     |     |     |  |  |
| 10:20~<br>10:25 | 124 | 142 | 149 | 142 | 137 | 160 | 169 | 155 | 143 | 133 | 140 | 148 | 166 | 136 | 110 | 132 | 161 | 145 | 131 | 94  | 142 | 166 | 173 | 144 | 156 | 160 | 151 | 138 |  |  |
| 10:25~<br>10:30 | 138 | 119 | 143 | 169 | 135 | 146 | 149 | 163 | 163 | 148 | 122 | 133 | 183 | 143 | 146 | 175 | 140 | 130 | 115 | 98  | 146 | 204 | 161 | 129 | 149 | 160 | 148 | 112 |  |  |
| 10:30~<br>10:35 | 131 | 152 | 137 | 162 | 138 | 141 | 152 | 165 | 138 | 153 | 131 | 154 | 153 | 163 | 155 | 136 | 159 | 170 | 124 | 72  | 161 | 154 | 158 | 143 | 147 | 171 | 178 | 139 |  |  |
| 10:35~<br>10:40 | 121 | 148 | 159 | 157 | 130 | 151 | 151 | 141 | 141 | 135 | 124 | 172 | 154 | 139 | 155 | 144 | 192 | 131 | 152 | 73  | 165 | 151 | 203 | 153 | 151 | 153 | 152 | 143 |  |  |
| 10:40~<br>10:45 | 133 | 152 | 145 | 153 | 142 | 169 | 152 | 150 | 135 | 187 | 118 | 126 | 157 | 152 | 187 | 174 | 145 | 153 | 171 | 96  | 131 | 156 | 148 | 119 | 137 | 140 | 188 | 134 |  |  |
| 10:45~<br>10:50 | 160 | 143 | 151 | 157 | 153 | 195 | 172 | 164 | 133 | 184 | 137 | 133 | 175 | 168 | 169 | 136 | 154 | 171 | 159 | 96  | 152 | 186 | 158 | 141 | 103 | 139 | 132 | 167 |  |  |
| 10:50~<br>10:55 | 154 | 145 | 173 | 143 | 150 | 190 | 167 | 151 | 142 | 144 | 121 | 169 | 169 | 176 | 139 | 169 | 154 | 176 | 133 | 102 | 161 | 209 | 192 | 149 | 138 | 167 | 173 | 153 |  |  |
| 10:55~<br>11:00 | 126 | 166 | 155 | 127 | 175 | 176 | 151 | 146 | 120 | 144 | 120 | 145 | 181 | 160 | 156 | 163 | 175 | 139 | 135 | 85  | 159 | 209 | 167 | 144 | 140 | 146 | 186 | 142 |  |  |
| 11:00~<br>11:05 | 135 | 151 | 131 | 157 | 142 | 197 | 172 | 151 | 146 | 163 | 134 | 138 | 175 | 158 | 147 | 154 | 150 | 166 | 155 | 86  | 136 | 219 | 172 | 127 | 166 | 116 | 153 | 168 |  |  |
| 11:05~<br>11:10 | 161 | 133 | 154 | 156 | 153 | 182 | 143 | 144 | 133 | 166 | 140 | 147 | 148 | 166 | 155 | 157 | 157 | 153 | 157 | 104 | 155 | 184 | 161 | 137 | 147 | 173 | 164 | 125 |  |  |
| 11:10~<br>11:15 | 174 | 156 | 151 | 159 | 151 | 213 | 170 | 191 | 138 | 166 | 129 | 175 | 159 | 158 | 159 | 177 | 169 | 175 | 159 | 87  | 176 | 160 | 163 | 158 | 147 | 153 | 214 | 150 |  |  |
| 11:15~<br>11:20 | 178 | 161 | 169 | 177 | 178 | 199 | 134 | 150 | 150 | 157 | 136 | 182 | 186 | 164 | 172 | 149 | 190 | 176 | 150 | 105 | 175 | 172 | 154 | 150 | 152 | 144 | 209 | 163 |  |  |
| 11:20~          | 168 | 156 | 186 | 151 | 178 | 219 | 149 | 168 | 128 | 169 | 127 | 134 | 186 | 128 | 192 | 168 | 190 | 168 | 126 | 96  | 178 | 203 | 164 | 148 | 144 | 177 | 198 | 160 |  |  |

|                 |     |     |     |     |     |     |     |     |     |     |     |     |     |     |     |     |     |     |     |     |     |     |     |     |     |     |     |     |  |
|-----------------|-----|-----|-----|-----|-----|-----|-----|-----|-----|-----|-----|-----|-----|-----|-----|-----|-----|-----|-----|-----|-----|-----|-----|-----|-----|-----|-----|-----|--|
| 11:25           |     |     |     |     |     |     |     |     |     |     |     |     |     |     |     |     |     |     |     |     |     |     |     |     |     |     |     |     |  |
| 11:25~<br>11:30 | 170 | 164 | 156 | 139 | 177 | 188 | 199 | 159 | 155 | 146 | 119 | 139 | 180 | 137 | 174 | 158 | 182 | 129 | 147 | 87  | 163 | 160 | 156 | 150 | 153 | 147 | 170 | 134 |  |
| 11:30~<br>11:35 | 182 | 158 | 159 | 145 | 162 | 201 | 181 | 160 | 142 | 169 | 136 | 189 | 185 | 203 | 164 | 173 | 168 | 158 | 158 | 92  | 177 | 172 | 159 | 157 | 180 | 134 | 152 | 127 |  |
| 11:35~<br>11:40 | 184 | 154 | 169 | 138 | 176 | 199 | 178 | 166 | 157 | 184 | 166 | 181 | 229 | 191 | 215 | 168 | 145 | 169 | 183 | 105 | 204 | 241 | 188 | 160 | 123 | 178 | 168 | 180 |  |
| 11:40~<br>11:45 | 153 | 169 | 187 | 139 | 185 | 176 | 210 | 191 | 206 | 170 | 133 | 161 | 220 | 212 | 168 | 187 | 196 | 159 | 194 | 117 | 197 | 197 | 156 | 174 | 159 | 170 | 227 | 214 |  |
| 11:45~<br>11:50 | 200 | 143 | 164 | 159 | 209 | 229 | 209 | 156 | 175 | 166 | 165 | 206 | 260 | 191 | 203 | 147 | 189 | 169 | 162 | 130 | 167 | 208 | 189 | 174 | 167 | 184 | 221 | 198 |  |
| 11:50~<br>11:55 | 188 | 188 | 186 | 167 | 218 | 234 | 216 | 212 | 169 | 169 | 145 | 203 | 246 | 151 | 206 | 209 | 185 | 174 | 176 | 131 | 162 | 199 | 183 | 170 | 176 | 168 | 202 | 185 |  |
| 11:55~<br>12:00 | 193 | 147 | 157 | 174 | 211 | 234 | 206 | 197 | 194 | 164 | 152 | 212 | 249 | 215 | 174 | 165 | 193 | 152 | 176 | 118 | 190 | 206 | 167 | 196 | 143 | 212 | 215 | 182 |  |
| 12:00~<br>12:05 | 178 | 183 | 164 | 166 | 226 | 306 | 209 | 239 | 188 | 174 | 146 | 184 | 223 | 235 | 214 | 162 | 207 | 145 | 187 | 112 | 201 | 204 | 183 | 198 | 191 | 200 | 215 | 208 |  |
| 12:05~<br>12:10 | 191 | 181 | 187 | 161 | 259 | 303 | 239 | 183 | 172 | 179 | 189 | 180 | 248 | 259 | 220 | 201 | 184 | 174 | 186 | 106 | 215 | 147 | 218 | 201 | 172 | 200 | 212 | 192 |  |
| 12:10~<br>12:15 | 182 | 189 | 167 | 197 | 291 | 392 | 391 | 164 | 178 | 168 | 181 | 164 | 241 | 253 | 180 | 190 | 161 | 171 | 187 | 98  | 182 | 250 | 206 | 204 | 161 | 171 | 278 | 252 |  |
| 12:15~<br>12:20 | 177 | 208 | 186 | 177 | 267 | 366 | 480 | 190 | 204 | 201 | 169 | 205 | 280 | 243 | 200 | 197 | 172 | 185 | 170 | 126 | 208 | 255 | 215 | 198 | 169 | 202 | 292 | 234 |  |
| 12:20~<br>12:25 | 151 | 169 | 164 | 178 | 247 | 332 | 344 | 169 | 177 | 177 | 130 | 170 | 244 | 247 | 182 | 180 | 184 | 190 | 162 | 101 | 210 | 248 | 233 | 144 | 169 | 226 | 295 | 195 |  |
| 12:25~          | 189 | 157 | 152 | 167 | 211 | 303 | 259 | 174 | 163 | 168 | 131 | 172 | 248 | 235 | 216 | 178 | 155 | 136 | 148 | 111 | 233 | 265 | 212 | 143 | 163 | 218 | 237 | 177 |  |

|                 |     |     |     |     |     |     |     |     |     |     |     |     |     |     |     |     |     |     |     |     |     |     |     |     |     |     |     |     |  |
|-----------------|-----|-----|-----|-----|-----|-----|-----|-----|-----|-----|-----|-----|-----|-----|-----|-----|-----|-----|-----|-----|-----|-----|-----|-----|-----|-----|-----|-----|--|
| 12:30           |     |     |     |     |     |     |     |     |     |     |     |     |     |     |     |     |     |     |     |     |     |     |     |     |     |     |     |     |  |
| 12:30~<br>12:35 | 170 | 153 | 180 | 147 | 236 | 295 | 231 | 159 | 185 | 160 | 164 | 157 | 285 | 256 | 147 | 188 | 185 | 202 | 183 | 113 | 166 | 294 | 193 | 172 | 151 | 157 | 218 | 209 |  |
| 12:35~<br>12:40 | 186 | 160 | 192 | 148 | 236 | 310 | 272 | 150 | 190 | 184 | 148 | 199 | 253 | 286 | 159 | 172 | 177 | 142 | 152 | 112 | 202 | 272 | 191 | 238 | 160 | 205 | 254 | 235 |  |
| 12:40~<br>12:45 | 201 | 159 | 173 | 166 | 245 | 323 | 262 | 151 | 185 | 210 | 147 | 197 | 243 | 224 | 192 | 157 | 166 | 161 | 172 | 108 | 193 | 243 | 208 | 169 | 141 | 201 | 243 | 199 |  |
| 12:45~<br>12:50 | 176 | 172 | 191 | 147 | 201 | 277 | 208 | 172 | 176 | 175 | 153 | 155 | 253 | 257 | 165 | 155 | 199 | 198 | 155 | 102 | 196 | 244 | 215 | 206 | 167 | 162 | 236 | 192 |  |
| 12:50~<br>12:55 | 195 | 166 | 164 | 171 | 228 | 302 | 273 | 179 | 168 | 178 | 156 | 169 | 260 | 229 | 189 | 164 | 171 | 181 | 161 | 102 | 189 | 221 | 195 | 215 | 172 | 181 | 255 | 194 |  |
| 12:55~<br>13:00 | 189 | 189 | 177 | 163 | 207 | 261 | 261 | 197 | 186 | 184 | 170 | 195 | 295 | 267 | 173 | 185 | 159 | 186 | 153 | 117 | 210 | 239 | 205 | 218 | 157 | 199 | 257 | 205 |  |
| 13:00~<br>13:05 | 174 | 171 | 195 | 169 | 216 | 295 | 282 | 184 | 175 | 183 | 168 | 205 | 289 | 254 | 155 | 149 | 223 | 183 | 174 | 98  | 229 | 191 | 221 | 189 | 159 | 166 | 245 | 240 |  |
| 13:05~<br>13:10 | 200 | 201 | 191 | 139 | 203 | 268 | 283 | 191 | 176 | 190 | 174 | 187 | 269 | 233 | 210 | 184 | 222 | 151 | 174 | 113 | 220 | 255 | 218 | 184 | 172 | 184 | 289 | 232 |  |
| 13:10~<br>13:15 | 175 | 215 | 220 | 196 | 185 | 270 | 274 | 191 | 194 | 187 | 188 | 195 | 280 | 225 | 188 | 182 | 209 | 181 | 167 | 107 | 276 | 211 | 186 | 174 | 143 | 198 | 267 | 247 |  |
| 13:15~<br>13:20 | 172 | 206 | 204 | 159 | 224 | 257 | 262 | 188 | 178 | 169 | 145 | 212 | 248 | 268 | 177 | 174 | 220 | 167 | 205 | 113 | 264 | 227 | 225 | 208 | 149 | 210 | 302 | 193 |  |
| 13:20~<br>13:25 | 196 | 216 | 218 | 179 | 204 | 302 | 303 | 171 | 187 | 177 | 165 | 174 | 289 | 267 | 178 | 195 | 175 | 220 | 171 | 125 | 238 | 271 | 209 | 204 | 176 | 239 | 243 | 202 |  |
| 13:25~<br>13:30 | 229 | 207 | 181 | 155 | 238 | 220 | 300 | 191 | 171 | 170 | 175 | 189 | 231 | 279 | 199 | 202 | 220 | 162 | 204 | 125 | 219 | 259 | 231 | 190 | 194 | 197 | 212 | 191 |  |
| 13:30~          | 183 | 205 | 212 | 158 | 229 | 294 | 264 | 173 | 169 | 200 | 168 | 189 | 296 | 257 | 204 | 186 | 174 | 185 | 205 | 127 | 234 | 253 | 280 | 190 | 168 | 154 | 243 | 199 |  |

|                 |     |     |     |     |     |     |     |     |     |     |     |     |     |     |     |     |     |     |     |     |     |     |     |     |     |     |     |     |
|-----------------|-----|-----|-----|-----|-----|-----|-----|-----|-----|-----|-----|-----|-----|-----|-----|-----|-----|-----|-----|-----|-----|-----|-----|-----|-----|-----|-----|-----|
| 13:35           |     |     |     |     |     |     |     |     |     |     |     |     |     |     |     |     |     |     |     |     |     |     |     |     |     |     |     |     |
| 13:35~<br>13:40 | 183 | 175 | 204 | 175 | 206 | 242 | 302 | 186 | 204 | 196 | 176 | 185 | 273 | 227 | 209 | 183 | 194 | 169 | 192 | 89  | 238 | 224 | 203 | 208 | 201 | 205 | 251 | 215 |
| 13:40~<br>13:45 | 191 | 190 | 173 | 160 | 179 | 281 | 276 | 184 | 186 | 186 | 156 | 188 | 284 | 269 | 214 | 192 | 217 | 205 | 176 | 144 | 214 | 265 | 209 | 168 | 147 | 212 | 243 | 245 |
| 13:45~<br>13:50 | 190 | 188 | 203 | 172 | 239 | 314 | 271 | 179 | 182 | 232 | 161 | 192 | 288 | 275 | 225 | 182 | 180 | 196 | 177 | 126 | 222 | 208 | 249 | 201 | 167 | 201 | 251 | 191 |
| 13:50~<br>13:55 | 190 | 207 | 208 | 157 | 237 | 245 | 311 | 198 | 197 | 172 | 152 | 223 | 233 | 275 | 192 | 199 | 183 | 151 | 159 | 112 | 273 | 255 | 203 | 211 | 188 | 202 | 200 | 235 |
| 13:55~<br>14:00 | 172 | 194 | 180 | 176 | 208 | 252 | 247 | 177 | 177 | 208 | 174 | 188 | 234 | 255 | 234 | 177 | 168 | 176 | 157 | 130 | 227 | 299 | 196 | 211 | 178 | 188 | 233 | 260 |
| 14:00~<br>14:05 | 178 | 192 | 184 | 170 | 176 | 253 | 326 | 183 | 189 | 182 | 155 | 207 | 260 | 294 | 166 | 146 | 163 | 183 | 182 | 130 | 227 | 299 | 164 | 210 | 176 | 156 | 284 | 251 |
| 14:05~<br>14:10 | 184 | 177 | 198 | 137 | 231 | 282 | 307 | 202 | 179 | 202 | 185 | 218 | 302 | 291 | 166 | 190 | 189 | 197 | 194 | 141 | 235 | 245 | 187 | 191 | 184 | 213 | 211 | 228 |
| 14:10~<br>14:15 | 207 | 186 | 189 | 163 | 210 | 327 | 252 | 202 | 202 | 190 | 184 | 208 | 356 | 313 | 218 | 184 | 169 | 177 | 198 | 123 | 248 | 246 | 215 | 235 | 184 | 239 | 241 | 212 |
| 14:15~<br>14:20 | 189 | 198 | 193 | 167 | 258 | 339 | 285 | 199 | 172 | 223 | 165 | 221 | 286 | 313 | 211 | 194 | 220 | 185 | 187 | 126 | 268 | 299 | 227 | 234 | 175 | 190 | 239 | 241 |
| 14:20~<br>14:25 | 205 | 182 | 201 | 186 | 219 | 333 | 272 | 193 | 172 | 222 | 205 | 227 | 306 | 249 | 218 | 203 | 161 | 191 | 220 | 140 | 250 | 282 | 217 | 223 | 165 | 205 | 263 | 225 |
| 14:25~<br>14:30 | 212 | 176 | 189 | 198 | 237 | 300 | 261 | 201 | 209 | 234 | 159 | 200 | 279 | 244 | 211 | 202 | 229 | 157 | 175 | 124 | 228 | 248 | 209 | 242 | 187 | 225 | 253 | 237 |
| 14:30~<br>14:35 | 184 | 197 | 215 | 182 | 211 | 296 | 263 | 222 | 186 | 216 | 144 | 239 | 327 | 272 | 214 | 193 | 238 | 198 | 206 | 139 | 249 | 215 | 219 | 243 | 227 | 242 | 211 | 229 |
| 14:35~          | 229 | 182 | 215 | 174 | 247 | 320 | 336 | 184 | 195 | 192 | 190 | 228 | 306 | 307 | 232 | 197 | 165 | 176 | 188 | 134 | 236 | 244 | 214 | 234 | 204 | 189 | 226 | 223 |



|                 |     |     |     |     |     |     |     |     |     |     |     |     |     |     |     |     |     |     |     |     |     |     |     |     |     |     |     |     |  |  |
|-----------------|-----|-----|-----|-----|-----|-----|-----|-----|-----|-----|-----|-----|-----|-----|-----|-----|-----|-----|-----|-----|-----|-----|-----|-----|-----|-----|-----|-----|--|--|
| 14:40           |     |     |     |     |     |     |     |     |     |     |     |     |     |     |     |     |     |     |     |     |     |     |     |     |     |     |     |     |  |  |
| 14:40~<br>14:45 | 208 | 183 | 170 | 216 | 208 | 284 | 297 | 193 | 194 | 212 | 198 | 207 | 323 | 248 | 209 | 233 | 188 | 156 | 189 | 127 | 264 | 248 | 246 | 231 | 223 | 220 | 244 | 254 |  |  |
| 14:45~<br>14:50 | 215 | 186 | 227 | 193 | 247 | 295 | 275 | 227 | 188 | 189 | 190 | 206 | 280 | 223 | 204 | 230 | 241 | 199 | 219 | 157 | 221 | 295 | 236 | 239 | 182 | 251 | 322 | 236 |  |  |
| 14:50~<br>14:55 | 196 | 243 | 248 | 226 | 246 | 324 | 278 | 225 | 244 | 230 | 192 | 232 | 316 | 259 | 220 | 186 | 225 | 218 | 199 | 159 | 220 | 305 | 251 | 269 | 198 | 263 | 249 | 220 |  |  |
| 14:55~<br>15:00 | 205 | 234 | 248 | 211 | 213 | 333 | 339 | 236 | 213 | 231 | 193 | 222 | 306 | 286 | 257 | 247 | 215 | 200 | 212 | 146 | 232 | 273 | 227 | 253 | 230 | 218 | 277 | 253 |  |  |
| 15:00~<br>15:05 | 220 | 211 | 216 | 217 | 245 | 338 | 298 | 233 | 223 | 231 | 261 | 211 | 306 | 312 | 217 | 211 | 237 | 181 | 215 | 137 | 240 | 247 | 218 | 217 | 245 | 220 | 253 | 243 |  |  |
| 15:05~<br>15:10 | 255 | 233 | 223 | 212 | 238 | 330 | 302 | 246 | 245 | 209 | 231 | 229 | 320 | 333 | 222 | 224 | 252 | 218 | 184 | 161 | 255 | 293 | 261 | 250 | 241 | 206 | 299 | 235 |  |  |
| 15:10~<br>15:15 | 226 | 245 | 260 | 229 | 283 | 356 | 321 | 239 | 292 | 278 | 252 | 262 | 292 | 290 | 265 | 248 | 244 | 229 | 232 | 139 | 223 | 339 | 272 | 269 | 254 | 283 | 301 | 285 |  |  |
| 15:15~<br>15:20 | 258 | 244 | 244 | 240 | 299 | 331 | 333 | 226 | 269 | 265 | 238 | 258 | 327 | 312 | 270 | 237 | 238 | 241 | 211 | 140 | 266 | 320 | 261 | 243 | 248 | 251 | 286 | 243 |  |  |
| 15:20~<br>15:25 | 269 | 271 | 244 | 224 | 283 | 313 | 319 | 230 | 244 | 268 | 242 | 263 | 312 | 324 | 257 | 245 | 261 | 239 | 226 | 136 | 269 | 301 | 294 | 195 | 251 | 281 | 279 | 241 |  |  |
| 15:25~<br>15:30 | 223 | 227 | 244 | 224 | 303 | 472 | 348 | 246 | 249 | 283 | 226 | 253 | 316 | 281 | 216 | 261 | 247 | 219 | 196 | 141 | 253 | 274 | 282 | 209 | 232 | 232 | 256 | 234 |  |  |
| 15:30~<br>15:35 | 290 | 237 | 224 | 221 | 318 | 526 | 314 | 271 | 300 | 236 | 217 | 226 | 312 | 376 | 262 | 238 | 202 | 224 | 275 | 167 | 283 | 262 | 252 | 219 | 226 | 255 | 244 | 269 |  |  |
| 15:35~<br>15:40 | 257 | 248 | 220 | 213 | 303 | 419 | 297 | 302 | 268 | 259 | 249 | 247 | 343 | 349 | 228 | 253 | 261 | 228 | 250 | 186 | 253 | 280 | 251 | 187 | 247 | 274 | 249 | 243 |  |  |
| 15:40~          | 262 | 210 | 257 | 259 | 327 | 373 | 294 | 271 | 273 | 241 | 332 | 282 | 313 | 303 | 195 | 224 | 262 | 240 | 239 | 155 | 264 | 275 | 263 | 202 | 230 | 263 | 231 | 266 |  |  |





|                 |     |     |     |     |     |     |     |     |     |     |     |     |     |     |     |     |     |     |     |     |     |     |     |     |     |     |     |     |
|-----------------|-----|-----|-----|-----|-----|-----|-----|-----|-----|-----|-----|-----|-----|-----|-----|-----|-----|-----|-----|-----|-----|-----|-----|-----|-----|-----|-----|-----|
| 17:55           |     |     |     |     |     |     |     |     |     |     |     |     |     |     |     |     |     |     |     |     |     |     |     |     |     |     |     |     |
| 17:55~<br>18:00 | 699 | 650 | 685 | 793 | 585 | 342 | 326 | 775 | 643 | 586 | 660 | 699 | 374 | 342 | 679 | 573 | 665 | 707 | 737 | 551 | 703 | 287 | 297 | 210 | 637 | 716 | 354 | 235 |
| 18:00~<br>18:05 | 681 | 617 | 690 | 669 | 653 | 352 | 347 | 659 | 622 | 552 | 628 | 655 | 388 | 292 | 661 | 626 | 665 | 641 | 658 | 556 | 614 | 293 | 277 | 227 | 649 | 636 | 368 | 238 |
| 18:05~<br>18:10 | 638 | 620 | 653 | 745 | 594 | 408 | 374 | 728 | 671 | 529 | 684 | 606 | 443 | 313 | 644 | 659 | 684 | 720 | 674 | 544 | 661 | 335 | 318 | 252 | 663 | 733 | 306 | 264 |
| 18:10~<br>18:15 | 743 | 724 | 715 | 787 | 662 | 385 | 384 | 735 | 633 | 558 | 693 | 667 | 393 | 352 | 699 | 730 | 749 | 691 | 766 | 568 | 621 | 321 | 314 | 202 | 670 | 690 | 372 | 254 |
| 18:15~<br>18:20 | 690 | 661 | 737 | 688 | 618 | 369 | 309 | 679 | 562 | 601 | 667 | 633 | 421 | 355 | 650 | 610 | 623 | 638 | 629 | 479 | 618 | 305 | 258 | 242 | 629 | 698 | 331 | 275 |
| 18:20~<br>18:25 | 575 | 563 | 602 | 624 | 587 | 382 | 346 | 654 | 557 | 627 | 630 | 652 | 387 | 264 | 598 | 531 | 590 | 537 | 573 | 503 | 598 | 337 | 307 | 207 | 633 | 565 | 298 | 222 |
| 18:25~<br>18:30 | 567 | 516 | 507 | 489 | 543 | 330 | 282 | 562 | 492 | 537 | 526 | 595 | 360 | 276 | 517 | 524 | 489 | 495 | 530 | 451 | 473 | 308 | 242 | 227 | 487 | 484 | 319 | 205 |
| 18:30~<br>18:35 | 510 | 497 | 466 | 477 | 503 | 302 | 297 | 530 | 416 | 445 | 438 | 523 | 343 | 255 | 462 | 469 | 431 | 401 | 478 | 385 | 432 | 274 | 243 | 209 | 476 | 437 | 290 | 243 |
| 18:35~<br>18:40 | 432 | 432 | 388 | 385 | 458 | 283 | 282 | 436 | 426 | 437 | 356 | 502 | 347 | 279 | 412 | 431 | 424 | 384 | 416 | 296 | 362 | 287 | 209 | 180 | 440 | 335 | 245 | 220 |
| 18:40~<br>18:45 | 365 | 353 | 370 | 350 | 362 | 287 | 264 | 366 | 351 | 360 | 359 | 398 | 333 | 247 | 341 | 323 | 384 | 326 | 388 | 279 | 434 | 259 | 220 | 186 | 332 | 351 | 261 | 164 |
| 18:45~<br>18:50 | 333 | 333 | 298 | 355 | 386 | 288 | 215 | 321 | 283 | 305 | 310 | 416 | 324 | 232 | 345 | 329 | 318 | 290 | 333 | 288 | 366 | 179 | 206 | 184 | 288 | 307 | 228 | 186 |
| 18:50~<br>18:55 | 270 | 305 | 352 | 271 | 330 | 246 | 245 | 310 | 298 | 313 | 290 | 304 | 283 | 230 | 342 | 324 | 316 | 285 | 299 | 238 | 316 | 231 | 242 | 149 | 342 | 306 | 229 | 165 |
| 18:55~          | 298 | 284 | 301 | 288 | 294 | 240 | 230 | 262 | 279 | 287 | 298 | 242 | 283 | 245 | 308 | 273 | 272 | 262 | 252 | 204 | 306 | 194 | 207 | 180 | 279 | 294 | 223 | 190 |



|                 |     |     |     |     |     |     |     |     |     |     |     |     |     |     |     |     |     |     |     |     |     |     |     |     |     |     |     |     |
|-----------------|-----|-----|-----|-----|-----|-----|-----|-----|-----|-----|-----|-----|-----|-----|-----|-----|-----|-----|-----|-----|-----|-----|-----|-----|-----|-----|-----|-----|
| 20:05           |     |     |     |     |     |     |     |     |     |     |     |     |     |     |     |     |     |     |     |     |     |     |     |     |     |     |     |     |
| 20:05~<br>20:10 | 194 | 160 | 168 | 151 | 237 | 176 | 189 | 172 | 170 | 144 | 176 | 121 | 210 | 169 | 154 | 162 | 163 | 155 | 171 | 137 | 209 | 148 | 149 | 130 | 166 | 189 | 167 | 124 |
| 20:10~<br>20:15 | 179 | 237 | 195 | 173 | 231 | 156 | 146 | 190 | 202 | 198 | 162 | 148 | 192 | 180 | 181 | 222 | 169 | 185 | 160 | 130 | 213 | 133 | 183 | 116 | 175 | 174 | 203 | 135 |
| 20:15~<br>20:20 | 207 | 195 | 191 | 135 | 231 | 158 | 179 | 152 | 171 | 173 | 147 | 128 | 193 | 171 | 148 | 171 | 174 | 178 | 169 | 160 | 166 | 139 | 124 | 97  | 166 | 155 | 131 | 152 |
| 20:20~<br>20:25 | 178 | 210 | 187 | 130 | 192 | 142 | 129 | 188 | 227 | 172 | 121 | 114 | 191 | 139 | 217 | 189 | 173 | 156 | 144 | 130 | 176 | 126 | 181 | 113 | 152 | 144 | 164 | 112 |
| 20:25~<br>20:30 | 169 | 183 | 196 | 140 | 203 | 122 | 149 | 186 | 200 | 196 | 126 | 177 | 173 | 134 | 184 | 166 | 219 | 140 | 188 | 140 | 168 | 176 | 113 | 115 | 171 | 145 | 145 | 129 |
| 20:30~<br>20:35 | 188 | 210 | 190 | 154 | 176 | 153 | 103 | 139 | 187 | 176 | 176 | 148 | 218 | 157 | 139 | 169 | 178 | 167 | 143 | 102 | 143 | 134 | 135 | 106 | 140 | 130 | 188 | 93  |
| 20:35~<br>20:40 | 167 | 176 | 156 | 144 | 187 | 128 | 135 | 139 | 168 | 195 | 146 | 117 | 161 | 123 | 182 | 152 | 144 | 158 | 135 | 126 | 142 | 151 | 129 | 110 | 163 | 161 | 145 | 113 |
| 20:40~<br>20:45 | 175 | 166 | 228 | 166 | 195 | 144 | 155 | 143 | 165 | 150 | 147 | 127 | 201 | 165 | 201 | 156 | 150 | 193 | 139 | 128 | 178 | 161 | 175 | 101 | 153 | 179 | 148 | 133 |
| 20:45~<br>20:50 | 190 | 168 | 258 | 166 | 174 | 148 | 155 | 141 | 150 | 186 | 160 | 130 | 168 | 135 | 174 | 146 | 167 | 151 | 155 | 142 | 166 | 148 | 116 | 86  | 135 | 163 | 147 | 123 |
| 20:50~<br>20:55 | 153 | 144 | 193 | 134 | 152 | 174 | 129 | 156 | 159 | 154 | 150 | 103 | 170 | 128 | 148 | 132 | 180 | 152 | 118 | 125 | 139 | 145 | 129 | 72  | 164 | 181 | 168 | 106 |
| 20:55~<br>21:00 | 162 | 153 | 167 | 136 | 202 | 176 | 132 | 141 | 110 | 138 | 135 | 135 | 159 | 106 | 162 | 159 | 145 | 147 | 135 | 116 | 161 | 132 | 135 | 104 | 135 | 153 | 138 | 109 |
| 21:00~<br>21:05 | 139 | 182 | 178 | 143 | 173 | 177 | 127 | 160 | 155 | 125 | 99  | 87  | 184 | 133 | 156 | 174 | 166 | 160 | 151 | 127 | 198 | 110 | 133 | 117 | 128 | 134 | 120 | 134 |
| 21:05~          | 221 | 247 | 206 | 196 | 205 | 179 | 143 | 156 | 174 | 155 | 148 | 122 | 185 | 148 | 187 | 211 | 225 | 216 | 150 | 175 | 185 | 151 | 154 | 115 | 197 | 186 | 167 | 101 |



|                 |     |     |     |     |     |     |     |     |     |     |     |    |     |     |     |     |     |     |     |    |     |    |    |    |     |     |     |     |
|-----------------|-----|-----|-----|-----|-----|-----|-----|-----|-----|-----|-----|----|-----|-----|-----|-----|-----|-----|-----|----|-----|----|----|----|-----|-----|-----|-----|
| 22:15           |     |     |     |     |     |     |     |     |     |     |     |    |     |     |     |     |     |     |     |    |     |    |    |    |     |     |     |     |
| 22:15~<br>22:20 | 107 | 131 | 120 | 106 | 97  | 82  | 111 | 97  | 103 | 99  | 69  | 51 | 96  | 64  | 79  | 100 | 100 | 84  | 90  | 55 | 79  | 50 | 82 | 55 | 107 | 80  | 82  | 93  |
| 22:20~<br>22:25 | 153 | 132 | 170 | 117 | 77  | 67  | 167 | 111 | 114 | 121 | 150 | 54 | 106 | 122 | 140 | 115 | 140 | 154 | 58  | 41 | 89  | 52 | 65 | 49 | 142 | 80  | 88  | 137 |
| 22:25~<br>22:30 | 129 | 128 | 142 | 171 | 62  | 66  | 147 | 143 | 125 | 127 | 155 | 46 | 61  | 169 | 133 | 116 | 123 | 145 | 76  | 74 | 69  | 57 | 53 | 53 | 149 | 74  | 60  | 176 |
| 22:30~<br>22:35 | 70  | 114 | 88  | 72  | 50  | 51  | 74  | 64  | 69  | 71  | 67  | 38 | 71  | 130 | 68  | 100 | 77  | 78  | 101 | 63 | 79  | 47 | 42 | 50 | 76  | 70  | 51  | 77  |
| 22:35~<br>22:40 | 34  | 64  | 44  | 68  | 77  | 65  | 44  | 31  | 62  | 57  | 63  | 24 | 66  | 69  | 68  | 75  | 80  | 55  | 86  | 56 | 69  | 49 | 65 | 48 | 53  | 73  | 69  | 67  |
| 22:40~<br>22:45 | 42  | 59  | 30  | 50  | 109 | 103 | 47  | 30  | 47  | 40  | 56  | 49 | 84  | 43  | 43  | 48  | 59  | 57  | 93  | 71 | 97  | 27 | 52 | 41 | 39  | 87  | 127 | 23  |
| 22:45~<br>22:50 | 43  | 43  | 42  | 25  | 108 | 115 | 32  | 35  | 44  | 41  | 39  | 37 | 97  | 25  | 44  | 31  | 36  | 44  | 83  | 66 | 102 | 39 | 37 | 21 | 48  | 90  | 92  | 32  |
| 22:50~<br>22:55 | 30  | 38  | 33  | 32  | 128 | 102 | 15  | 24  | 30  | 27  | 18  | 67 | 137 | 32  | 39  | 39  | 29  | 42  | 109 | 76 | 134 | 37 | 43 | 27 | 39  | 123 | 114 | 21  |
| 22:55~<br>23:00 | 29  | 38  | 39  | 35  | 77  | 75  | 26  | 25  | 22  | 26  | 31  | 51 | 111 | 39  | 30  | 40  | 28  | 24  | 66  | 86 | 129 | 32 | 58 | 15 | 21  | 124 | 111 | 33  |

**APPENDIX TABLE 3 The origin 5-min entrance ridership data at Zhujiang Station of Nanjing Metro from April 9 to May 6 2012**

| date      | 2012/4/9 | 2012/4/10 | 2012/4/11 | 2012/4/12 | 2012/4/13 | 2012/4/14 | 2012/4/15 | 2012/4/16 | 2012/4/17 | 2012/4/18 | 2012/4/19 | 2012/4/20 | 2012/4/21 | 2012/4/22 | 2012/4/23 | 2012/4/24 | 2012/4/25 | 2012/4/26 | 2012/4/27 | 2012/4/28 | 2012/4/29 | 2012/4/30 | 2012/5/1 | 2012/5/2 | 2012/5/3 | 2012/5/4 | 2012/5/5 | 2012/5/6 |
|-----------|----------|-----------|-----------|-----------|-----------|-----------|-----------|-----------|-----------|-----------|-----------|-----------|-----------|-----------|-----------|-----------|-----------|-----------|-----------|-----------|-----------|-----------|----------|----------|----------|----------|----------|----------|
| 6:00~6:05 | 16       | 11        | 16        | 22        | 12        | 30        | 22        | 16        | 20        | 24        | 17        | 20        | 24        | 21        | 26        | 13        | 16        | 24        | 22        | 22        | 28        | 26        | 13       | 26       | 18       | 16       | 23       | 11       |
| 6:05~6:10 | 16       | 26        | 33        | 24        | 17        | 31        | 27        | 19        | 16        | 19        | 24        | 15        | 35        | 17        | 27        | 18        | 25        | 31        | 22        | 30        | 43        | 16        | 23       | 26       | 13       | 31       | 22       | 14       |



|                          |     |     |     |     |     |    |    |     |     |     |     |     |    |    |     |     |     |     |     |     |    |    |    |     |     |     |    |    |
|--------------------------|-----|-----|-----|-----|-----|----|----|-----|-----|-----|-----|-----|----|----|-----|-----|-----|-----|-----|-----|----|----|----|-----|-----|-----|----|----|
| 6:10 <sup>6</sup><br>:15 | 28  | 17  | 21  | 29  | 20  | 35 | 20 | 29  | 24  | 23  | 37  | 21  | 18 | 17 | 28  | 26  | 25  | 28  | 28  | 25  | 36 | 29 | 22 | 21  | 25  | 18  | 30 | 25 |
| 6:15 <sup>6</sup><br>:20 | 26  | 20  | 19  | 20  | 18  | 39 | 24 | 31  | 28  | 26  | 31  | 26  | 22 | 23 | 35  | 22  | 21  | 18  | 25  | 36  | 49 | 27 | 13 | 30  | 23  | 24  | 17 | 19 |
| 6:20 <sup>6</sup><br>:25 | 36  | 36  | 23  | 22  | 29  | 28 | 23 | 41  | 33  | 43  | 33  | 30  | 30 | 25 | 49  | 35  | 26  | 36  | 34  | 37  | 54 | 35 | 20 | 37  | 26  | 25  | 29 | 16 |
| 6:25 <sup>6</sup><br>:30 | 54  | 37  | 46  | 40  | 33  | 38 | 35 | 55  | 42  | 41  | 26  | 31  | 31 | 28 | 57  | 42  | 43  | 57  | 37  | 41  | 51 | 31 | 18 | 57  | 36  | 40  | 29 | 34 |
| 6:30 <sup>6</sup><br>:35 | 55  | 39  | 36  | 42  | 38  | 36 | 33 | 65  | 45  | 42  | 46  | 31  | 38 | 27 | 51  | 35  | 40  | 39  | 45  | 41  | 54 | 30 | 20 | 50  | 35  | 46  | 44 | 24 |
| 6:35 <sup>6</sup><br>:40 | 47  | 47  | 45  | 55  | 39  | 46 | 37 | 60  | 44  | 34  | 45  | 49  | 38 | 34 | 53  | 55  | 48  | 54  | 47  | 51  | 56 | 40 | 27 | 61  | 62  | 53  | 37 | 32 |
| 6:40 <sup>6</sup><br>:45 | 65  | 49  | 46  | 69  | 47  | 59 | 44 | 68  | 48  | 55  | 51  | 67  | 56 | 25 | 70  | 48  | 49  | 48  | 56  | 50  | 53 | 36 | 24 | 52  | 55  | 45  | 38 | 24 |
| 6:45 <sup>6</sup><br>:50 | 69  | 73  | 70  | 69  | 52  | 47 | 30 | 80  | 55  | 53  | 69  | 70  | 49 | 48 | 68  | 49  | 62  | 67  | 72  | 76  | 52 | 32 | 37 | 60  | 72  | 51  | 53 | 45 |
| 6:50 <sup>6</sup><br>:55 | 87  | 74  | 75  | 83  | 90  | 81 | 61 | 67  | 82  | 75  | 83  | 80  | 73 | 33 | 81  | 88  | 75  | 85  | 83  | 73  | 73 | 56 | 25 | 87  | 77  | 72  | 49 | 29 |
| 6:55 <sup>7</sup><br>:00 | 84  | 84  | 79  | 105 | 73  | 77 | 60 | 89  | 94  | 81  | 58  | 108 | 75 | 40 | 85  | 70  | 86  | 81  | 94  | 76  | 72 | 54 | 29 | 69  | 84  | 77  | 63 | 48 |
| 7:00 <sup>7</sup><br>:05 | 96  | 97  | 97  | 106 | 101 | 73 | 55 | 105 | 93  | 89  | 92  | 91  | 57 | 62 | 87  | 87  | 94  | 105 | 98  | 101 | 81 | 61 | 30 | 104 | 81  | 78  | 46 | 31 |
| 7:05 <sup>7</sup><br>:10 | 120 | 102 | 115 | 111 | 85  | 62 | 78 | 109 | 116 | 88  | 93  | 105 | 69 | 52 | 118 | 112 | 103 | 128 | 119 | 116 | 86 | 38 | 46 | 110 | 108 | 115 | 70 | 32 |
| 7:10 <sup>7</sup><br>:15 | 124 | 118 | 108 | 133 | 78  | 87 | 53 | 125 | 104 | 115 | 131 | 107 | 64 | 59 | 137 | 118 | 177 | 126 | 121 | 97  | 92 | 62 | 27 | 103 | 121 | 109 | 57 | 38 |

|               |     |     |     |     |     |     |     |     |     |     |     |     |     |     |     |     |     |     |     |     |     |     |    |     |     |     |     |    |
|---------------|-----|-----|-----|-----|-----|-----|-----|-----|-----|-----|-----|-----|-----|-----|-----|-----|-----|-----|-----|-----|-----|-----|----|-----|-----|-----|-----|----|
| 7:15~7<br>:20 | 140 | 121 | 137 | 131 | 110 | 105 | 65  | 137 | 131 | 127 | 130 | 111 | 67  | 59  | 139 | 139 | 170 | 135 | 125 | 117 | 92  | 49  | 42 | 151 | 126 | 98  | 76  | 60 |
| 7:20~7<br>:25 | 142 | 140 | 138 | 157 | 104 | 104 | 82  | 151 | 160 | 135 | 147 | 150 | 104 | 67  | 150 | 146 | 152 | 149 | 147 | 110 | 78  | 60  | 51 | 139 | 129 | 155 | 80  | 45 |
| 7:25~7<br>:30 | 125 | 145 | 157 | 120 | 126 | 113 | 91  | 146 | 146 | 160 | 167 | 137 | 73  | 63  | 142 | 121 | 213 | 139 | 153 | 130 | 75  | 78  | 52 | 141 | 138 | 123 | 74  | 54 |
| 7:30~7<br>:35 | 170 | 138 | 161 | 160 | 130 | 109 | 91  | 176 | 177 | 150 | 171 | 148 | 88  | 78  | 176 | 160 | 161 | 188 | 185 | 113 | 75  | 89  | 34 | 175 | 164 | 141 | 81  | 57 |
| 7:35~7<br>:40 | 168 | 155 | 160 | 144 | 159 | 81  | 74  | 185 | 168 | 160 | 174 | 149 | 115 | 61  | 159 | 166 | 163 | 170 | 162 | 140 | 67  | 65  | 57 | 169 | 161 | 141 | 81  | 57 |
| 7:40~7<br>:45 | 202 | 174 | 170 | 163 | 173 | 112 | 60  | 199 | 164 | 180 | 187 | 190 | 112 | 61  | 178 | 186 | 191 | 194 | 183 | 161 | 67  | 57  | 79 | 191 | 175 | 174 | 105 | 79 |
| 7:45~7<br>:50 | 175 | 177 | 170 | 204 | 180 | 104 | 97  | 206 | 195 | 222 | 185 | 177 | 101 | 70  | 202 | 179 | 190 | 191 | 201 | 142 | 90  | 69  | 65 | 209 | 197 | 168 | 93  | 74 |
| 7:50~7<br>:55 | 217 | 198 | 233 | 218 | 156 | 122 | 112 | 240 | 230 | 211 | 232 | 194 | 106 | 84  | 195 | 196 | 196 | 204 | 211 | 154 | 77  | 99  | 51 | 186 | 189 | 188 | 98  | 65 |
| 7:55~8<br>:00 | 206 | 216 | 211 | 192 | 193 | 117 | 85  | 203 | 230 | 212 | 184 | 200 | 120 | 83  | 218 | 244 | 211 | 179 | 223 | 164 | 88  | 84  | 54 | 190 | 183 | 189 | 94  | 74 |
| 8:00~8<br>:05 | 214 | 211 | 165 | 209 | 194 | 142 | 91  | 192 | 208 | 211 | 211 | 199 | 103 | 98  | 179 | 159 | 203 | 207 | 188 | 163 | 78  | 94  | 83 | 192 | 197 | 174 | 100 | 75 |
| 8:05~8<br>:10 | 209 | 211 | 213 | 210 | 222 | 137 | 131 | 235 | 207 | 202 | 206 | 198 | 139 | 99  | 203 | 185 | 213 | 208 | 205 | 190 | 121 | 96  | 61 | 182 | 207 | 189 | 104 | 90 |
| 8:10~8<br>:15 | 196 | 172 | 183 | 189 | 177 | 134 | 109 | 166 | 245 | 220 | 166 | 192 | 117 | 103 | 186 | 196 | 186 | 212 | 195 | 165 | 118 | 126 | 92 | 217 | 184 | 193 | 107 | 59 |
| 8:15~8<br>:20 | 175 | 190 | 189 | 201 | 201 | 159 | 115 | 195 | 221 | 213 | 225 | 196 | 104 | 97  | 209 | 224 | 208 | 197 | 216 | 147 | 118 | 125 | 89 | 166 | 195 | 178 | 116 | 80 |

|                          |     |     |     |     |     |     |     |     |     |     |     |     |     |     |     |     |     |     |     |     |     |     |     |     |     |     |     |     |
|--------------------------|-----|-----|-----|-----|-----|-----|-----|-----|-----|-----|-----|-----|-----|-----|-----|-----|-----|-----|-----|-----|-----|-----|-----|-----|-----|-----|-----|-----|
| 8:20 <sup>8</sup><br>:25 | 180 | 199 | 205 | 186 | 155 | 126 | 80  | 221 | 217 | 178 | 196 | 201 | 133 | 103 | 199 | 178 | 189 | 192 | 172 | 165 | 131 | 113 | 92  | 174 | 196 | 167 | 108 | 98  |
| 8:25 <sup>8</sup><br>:30 | 185 | 202 | 179 | 171 | 149 | 149 | 107 | 189 | 185 | 205 | 163 | 178 | 113 | 102 | 164 | 188 | 176 | 187 | 187 | 152 | 117 | 118 | 70  | 159 | 160 | 164 | 110 | 93  |
| 8:30 <sup>8</sup><br>:35 | 151 | 170 | 165 | 186 | 181 | 135 | 112 | 217 | 205 | 194 | 139 | 157 | 120 | 103 | 194 | 173 | 174 | 175 | 140 | 139 | 172 | 100 | 97  | 148 | 168 | 171 | 130 | 109 |
| 8:35 <sup>8</sup><br>:40 | 156 | 165 | 162 | 187 | 131 | 150 | 123 | 154 | 191 | 137 | 178 | 147 | 106 | 140 | 145 | 151 | 154 | 174 | 174 | 125 | 124 | 137 | 72  | 124 | 131 | 165 | 98  | 112 |
| 8:40 <sup>8</sup><br>:45 | 147 | 162 | 174 | 137 | 140 | 128 | 91  | 174 | 181 | 183 | 149 | 155 | 124 | 122 | 146 | 130 | 146 | 126 | 166 | 118 | 135 | 115 | 69  | 125 | 145 | 123 | 95  | 91  |
| 8:45 <sup>8</sup><br>:50 | 134 | 171 | 132 | 158 | 145 | 122 | 106 | 169 | 143 | 144 | 174 | 159 | 117 | 115 | 132 | 142 | 121 | 127 | 137 | 115 | 134 | 126 | 81  | 130 | 116 | 123 | 132 | 75  |
| 8:50 <sup>8</sup><br>:55 | 119 | 155 | 140 | 130 | 121 | 150 | 132 | 152 | 159 | 138 | 144 | 159 | 102 | 98  | 115 | 128 | 113 | 129 | 129 | 99  | 106 | 130 | 90  | 114 | 122 | 139 | 107 | 132 |
| 8:55 <sup>9</sup><br>:00 | 116 | 135 | 127 | 142 | 125 | 137 | 118 | 175 | 158 | 160 | 136 | 142 | 111 | 119 | 129 | 100 | 129 | 121 | 139 | 99  | 122 | 158 | 143 | 132 | 115 | 130 | 98  | 74  |
| 9:00 <sup>9</sup><br>:05 | 128 | 117 | 129 | 125 | 95  | 140 | 114 | 148 | 170 | 158 | 133 | 113 | 129 | 87  | 132 | 147 | 143 | 112 | 120 | 113 | 150 | 159 | 150 | 113 | 102 | 108 | 108 | 102 |
| 9:05 <sup>9</sup><br>:10 | 116 | 112 | 142 | 111 | 110 | 117 | 111 | 120 | 120 | 144 | 114 | 155 | 143 | 100 | 134 | 117 | 137 | 159 | 135 | 121 | 153 | 126 | 104 | 133 | 130 | 130 | 127 | 68  |
| 9:10 <sup>9</sup><br>:15 | 146 | 117 | 154 | 112 | 143 | 138 | 151 | 127 | 137 | 151 | 133 | 112 | 125 | 137 | 110 | 125 | 128 | 126 | 130 | 104 | 146 | 137 | 120 | 114 | 116 | 138 | 129 | 126 |
| 9:15 <sup>9</sup><br>:20 | 131 | 101 | 127 | 127 | 123 | 109 | 157 | 151 | 142 | 144 | 131 | 119 | 158 | 115 | 124 | 127 | 167 | 122 | 129 | 127 | 137 | 143 | 122 | 129 | 100 | 122 | 124 | 113 |
| 9:20 <sup>9</sup><br>:25 | 117 | 119 | 131 | 122 | 114 | 124 | 119 | 160 | 137 | 160 | 128 | 144 | 133 | 115 | 91  | 129 | 107 | 127 | 139 | 97  | 159 | 151 | 137 | 102 | 136 | 114 | 128 | 105 |

|             |     |     |     |     |     |     |     |     |     |     |     |     |     |     |     |     |     |     |     |     |     |     |     |     |     |     |     |     |
|-------------|-----|-----|-----|-----|-----|-----|-----|-----|-----|-----|-----|-----|-----|-----|-----|-----|-----|-----|-----|-----|-----|-----|-----|-----|-----|-----|-----|-----|
| 9:25~9:30   | 113 | 129 | 105 | 140 | 101 | 148 | 105 | 134 | 159 | 120 | 140 | 154 | 135 | 140 | 139 | 123 | 134 | 138 | 137 | 105 | 178 | 152 | 103 | 122 | 138 | 138 | 143 | 157 |
| 9:30~9:35   | 114 | 135 | 136 | 128 | 106 | 133 | 124 | 145 | 161 | 123 | 130 | 130 | 135 | 146 | 135 | 112 | 133 | 148 | 134 | 101 | 163 | 150 | 119 | 126 | 121 | 90  | 139 | 110 |
| 9:35~9:40   | 153 | 118 | 154 | 123 | 131 | 148 | 126 | 141 | 126 | 139 | 163 | 132 | 127 | 113 | 114 | 130 | 136 | 153 | 170 | 148 | 138 | 189 | 130 | 111 | 131 | 137 | 121 | 132 |
| 9:40~9:45   | 132 | 156 | 142 | 111 | 131 | 138 | 142 | 128 | 134 | 139 | 126 | 137 | 119 | 141 | 123 | 126 | 104 | 164 | 147 | 120 | 150 | 173 | 128 | 97  | 101 | 122 | 139 | 125 |
| 9:45~9:50   | 135 | 148 | 127 | 117 | 144 | 168 | 161 | 150 | 144 | 145 | 151 | 156 | 139 | 138 | 132 | 132 | 142 | 154 | 155 | 88  | 140 | 161 | 121 | 107 | 126 | 113 | 143 | 136 |
| 9:50~9:55   | 123 | 139 | 108 | 164 | 139 | 150 | 133 | 127 | 147 | 147 | 150 | 148 | 150 | 111 | 147 | 133 | 107 | 126 | 196 | 103 | 142 | 172 | 142 | 118 | 112 | 133 | 105 | 147 |
| 9:55~10:00  | 146 | 126 | 159 | 150 | 131 | 121 | 129 | 137 | 131 | 151 | 170 | 157 | 152 | 118 | 137 | 127 | 123 | 148 | 147 | 122 | 174 | 140 | 135 | 130 | 149 | 131 | 133 | 148 |
| 10:00~10:05 | 119 | 154 | 136 | 135 | 104 | 180 | 112 | 120 | 157 | 180 | 134 | 129 | 110 | 130 | 126 | 132 | 124 | 146 | 180 | 109 | 186 | 184 | 137 | 138 | 104 | 135 | 145 | 146 |
| 10:05~10:10 | 128 | 143 | 144 | 127 | 134 | 156 | 173 | 129 | 187 | 151 | 143 | 177 | 87  | 125 | 151 | 159 | 142 | 146 | 156 | 141 | 175 | 206 | 163 | 121 | 136 | 142 | 139 | 144 |
| 10:10~10:15 | 154 | 183 | 166 | 122 | 115 | 140 | 239 | 139 | 164 | 169 | 164 | 135 | 150 | 169 | 135 | 160 | 162 | 147 | 172 | 118 | 225 | 193 | 172 | 130 | 117 | 159 | 156 | 178 |
| 10:15~10:20 | 144 | 137 | 135 | 148 | 103 | 169 | 140 | 168 | 182 | 153 | 164 | 144 | 150 | 142 | 115 | 179 | 144 | 133 | 166 | 157 | 160 | 220 | 169 | 131 | 132 | 148 | 166 | 153 |
| 10:20~10:25 | 148 | 149 | 153 | 115 | 154 | 164 | 214 | 141 | 152 | 155 | 155 | 170 | 167 | 153 | 156 | 154 | 158 | 163 | 156 | 128 | 164 | 145 | 187 | 136 | 153 | 146 | 153 | 139 |
| 10:25~10:30 | 159 | 126 | 149 | 133 | 167 | 153 | 203 | 172 | 151 | 142 | 160 | 156 | 173 | 146 | 156 | 153 | 142 | 165 | 155 | 113 | 147 | 203 | 152 | 138 | 155 | 166 | 143 | 116 |

|                 |     |     |     |     |     |     |     |     |     |     |     |     |     |     |     |     |     |     |     |     |     |     |     |     |     |     |     |     |
|-----------------|-----|-----|-----|-----|-----|-----|-----|-----|-----|-----|-----|-----|-----|-----|-----|-----|-----|-----|-----|-----|-----|-----|-----|-----|-----|-----|-----|-----|
| 10:30~<br>10:35 | 143 | 155 | 125 | 167 | 153 | 159 | 195 | 159 | 160 | 172 | 173 | 158 | 170 | 141 | 139 | 152 | 137 | 162 | 147 | 138 | 143 | 187 | 154 | 133 | 149 | 147 | 162 | 168 |
| 10:35~<br>10:40 | 163 | 160 | 149 | 132 | 165 | 147 | 197 | 164 | 169 | 156 | 165 | 179 | 165 | 170 | 136 | 178 | 157 | 153 | 150 | 129 | 172 | 191 | 146 | 153 | 150 | 167 | 135 | 136 |
| 10:40~<br>10:45 | 180 | 156 | 150 | 147 | 146 | 213 | 215 | 133 | 168 | 162 | 163 | 180 | 175 | 179 | 149 | 162 | 136 | 152 | 168 | 129 | 200 | 186 | 180 | 151 | 135 | 156 | 174 | 137 |
| 10:45~<br>10:50 | 156 | 153 | 173 | 168 | 138 | 155 | 192 | 141 | 166 | 157 | 160 | 158 | 161 | 173 | 177 | 166 | 122 | 181 | 179 | 114 | 140 | 181 | 183 | 139 | 167 | 182 | 159 | 141 |
| 10:50~<br>10:55 | 157 | 165 | 147 | 162 | 172 | 178 | 203 | 136 | 173 | 166 | 151 | 151 | 143 | 192 | 170 | 171 | 155 | 148 | 188 | 155 | 153 | 189 | 198 | 147 | 145 | 209 | 149 | 143 |
| 10:55~<br>11:00 | 132 | 151 | 131 | 133 | 193 | 194 | 194 | 161 | 151 | 134 | 168 | 175 | 174 | 145 | 136 | 168 | 149 | 153 | 158 | 125 | 177 | 148 | 185 | 129 | 136 | 179 | 181 | 157 |
| 11:00~<br>11:05 | 177 | 152 | 159 | 140 | 149 | 210 | 178 | 161 | 179 | 142 | 156 | 190 | 197 | 153 | 198 | 204 | 136 | 141 | 185 | 150 | 184 | 177 | 162 | 102 | 159 | 147 | 175 | 184 |
| 11:05~<br>11:10 | 151 | 156 | 192 | 154 | 133 | 237 | 176 | 171 | 177 | 160 | 162 | 161 | 191 | 144 | 159 | 138 | 134 | 130 | 158 | 115 | 205 | 178 | 147 | 134 | 156 | 132 | 160 | 137 |
| 11:10~<br>11:15 | 177 | 163 | 131 | 160 | 132 | 172 | 189 | 161 | 140 | 168 | 179 | 156 | 186 | 197 | 169 | 147 | 144 | 133 | 147 | 156 | 186 | 150 | 179 | 130 | 153 | 172 | 205 | 159 |
| 11:15~<br>11:20 | 169 | 128 | 140 | 142 | 181 | 177 | 176 | 174 | 191 | 161 | 150 | 136 | 152 | 172 | 198 | 173 | 163 | 161 | 133 | 144 | 170 | 157 | 170 | 142 | 150 | 149 | 185 | 176 |
| 11:20~<br>11:25 | 145 | 146 | 162 | 135 | 162 | 190 | 181 | 140 | 145 | 164 | 184 | 179 | 176 | 165 | 164 | 169 | 190 | 133 | 169 | 143 | 150 | 164 | 173 | 137 | 197 | 135 | 164 | 163 |
| 11:25~<br>11:30 | 131 | 168 | 152 | 172 | 183 | 149 | 173 | 147 | 169 | 164 | 179 | 147 | 198 | 180 | 141 | 165 | 149 | 147 | 158 | 155 | 157 | 188 | 179 | 147 | 138 | 203 | 165 | 149 |
| 11:30~<br>11:35 | 150 | 170 | 162 | 185 | 181 | 202 | 188 | 148 | 191 | 159 | 184 | 228 | 200 | 202 | 153 | 180 | 144 | 176 | 193 | 137 | 152 | 146 | 135 | 153 | 130 | 150 | 162 | 162 |

|                 |     |     |     |     |     |     |     |     |     |     |     |     |     |     |     |     |     |     |     |     |     |     |     |     |     |     |     |     |
|-----------------|-----|-----|-----|-----|-----|-----|-----|-----|-----|-----|-----|-----|-----|-----|-----|-----|-----|-----|-----|-----|-----|-----|-----|-----|-----|-----|-----|-----|
| 11:35~<br>11:40 | 183 | 167 | 126 | 167 | 137 | 196 | 199 | 203 | 183 | 165 | 167 | 208 | 181 | 184 | 184 | 168 | 147 | 164 | 187 | 146 | 207 | 181 | 181 | 187 | 169 | 181 | 177 | 191 |
| 11:40~<br>11:45 | 198 | 167 | 162 | 147 | 185 | 252 | 218 | 205 | 208 | 159 | 166 | 209 | 166 | 188 | 160 | 176 | 154 | 162 | 181 | 179 | 211 | 203 | 146 | 193 | 185 | 175 | 196 | 207 |
| 11:45~<br>11:50 | 192 | 172 | 186 | 168 | 180 | 224 | 221 | 189 | 172 | 191 | 169 | 209 | 191 | 192 | 189 | 174 | 199 | 189 | 215 | 223 | 180 | 186 | 183 | 175 | 167 | 198 | 193 | 220 |
| 11:50~<br>11:55 | 180 | 203 | 198 | 169 | 189 | 235 | 238 | 180 | 163 | 157 | 190 | 191 | 236 | 201 | 163 | 200 | 171 | 193 | 177 | 187 | 179 | 185 | 209 | 156 | 178 | 183 | 212 | 186 |
| 11:55~<br>12:00 | 197 | 193 | 201 | 167 | 142 | 203 | 233 | 205 | 209 | 164 | 187 | 153 | 215 | 194 | 175 | 178 | 233 | 174 | 182 | 164 | 192 | 202 | 185 | 180 | 173 | 181 | 237 | 202 |
| 12:00~<br>12:05 | 158 | 149 | 175 | 195 | 182 | 285 | 273 | 261 | 265 | 198 | 175 | 215 | 207 | 196 | 162 | 157 | 211 | 179 | 222 | 173 | 181 | 160 | 181 | 166 | 171 | 182 | 215 | 206 |
| 12:05~<br>12:10 | 169 | 169 | 161 | 166 | 181 | 250 | 221 | 248 | 232 | 191 | 218 | 190 | 223 | 197 | 173 | 157 | 176 | 198 | 233 | 176 | 209 | 185 | 225 | 169 | 179 | 223 | 178 | 223 |
| 12:10~<br>12:15 | 164 | 143 | 206 | 171 | 178 | 233 | 295 | 192 | 189 | 214 | 186 | 179 | 224 | 236 | 166 | 173 | 190 | 179 | 193 | 176 | 225 | 212 | 243 | 172 | 157 | 179 | 236 | 247 |
| 12:15~<br>12:20 | 171 | 191 | 217 | 166 | 174 | 278 | 274 | 171 | 209 | 170 | 178 | 218 | 252 | 254 | 200 | 155 | 192 | 223 | 168 | 179 | 231 | 245 | 235 | 164 | 172 | 188 | 239 | 246 |
| 12:20~<br>12:25 | 188 | 149 | 180 | 132 | 191 | 276 | 250 | 176 | 204 | 166 | 200 | 198 | 233 | 241 | 172 | 168 | 184 | 166 | 183 | 188 | 238 | 233 | 177 | 134 | 183 | 184 | 224 | 281 |
| 12:25~<br>12:30 | 164 | 154 | 178 | 135 | 190 | 289 | 255 | 174 | 169 | 191 | 183 | 185 | 257 | 224 | 159 | 148 | 199 | 181 | 183 | 176 | 234 | 206 | 215 | 155 | 175 | 176 | 224 | 252 |
| 12:30~<br>12:35 | 149 | 164 | 168 | 165 | 147 | 335 | 276 | 197 | 173 | 185 | 168 | 175 | 273 | 220 | 179 | 152 | 207 | 190 | 172 | 163 | 226 | 248 | 255 | 182 | 155 | 188 | 187 | 248 |
| 12:35~<br>12:40 | 198 | 175 | 169 | 181 | 158 | 315 | 239 | 187 | 209 | 194 | 161 | 169 | 220 | 221 | 166 | 167 | 182 | 178 | 199 | 179 | 231 | 201 | 185 | 142 | 160 | 183 | 219 | 211 |

|                 |     |     |     |     |     |     |     |     |     |     |     |     |     |     |     |     |     |     |     |     |     |     |     |     |     |     |     |     |
|-----------------|-----|-----|-----|-----|-----|-----|-----|-----|-----|-----|-----|-----|-----|-----|-----|-----|-----|-----|-----|-----|-----|-----|-----|-----|-----|-----|-----|-----|
| 12:40~<br>12:45 | 165 | 151 | 165 | 170 | 189 | 279 | 211 | 178 | 186 | 141 | 174 | 176 | 234 | 219 | 156 | 176 | 183 | 187 | 196 | 193 | 238 | 200 | 184 | 180 | 229 | 181 | 245 | 197 |
| 12:45~<br>12:50 | 164 | 205 | 142 | 177 | 211 | 300 | 247 | 170 | 181 | 175 | 200 | 144 | 230 | 244 | 176 | 152 | 139 | 186 | 155 | 202 | 258 | 181 | 184 | 161 | 163 | 222 | 246 | 248 |
| 12:50~<br>12:55 | 148 | 148 | 180 | 194 | 178 | 247 | 165 | 166 | 210 | 168 | 145 | 183 | 231 | 212 | 139 | 162 | 174 | 168 | 211 | 199 | 251 | 215 | 205 | 169 | 176 | 155 | 253 | 205 |
| 12:55~<br>13:00 | 190 | 144 | 155 | 171 | 185 | 264 | 226 | 195 | 159 | 183 | 142 | 165 | 223 | 256 | 151 | 149 | 173 | 181 | 175 | 188 | 230 | 195 | 200 | 180 | 200 | 176 | 203 | 220 |
| 13:00~<br>13:05 | 176 | 210 | 178 | 155 | 177 | 265 | 255 | 158 | 205 | 200 | 162 | 224 | 229 | 226 | 169 | 157 | 161 | 175 | 217 | 202 | 229 | 242 | 216 | 168 | 163 | 223 | 216 | 206 |
| 13:05~<br>13:10 | 171 | 165 | 176 | 187 | 198 | 277 | 226 | 191 | 196 | 176 | 199 | 189 | 222 | 256 | 168 | 180 | 170 | 178 | 190 | 234 | 203 | 197 | 178 | 168 | 156 | 174 | 225 | 212 |
| 13:10~<br>13:15 | 190 | 185 | 207 | 187 | 194 | 250 | 265 | 226 | 189 | 188 | 188 | 166 | 220 | 250 | 157 | 159 | 177 | 170 | 207 | 230 | 212 | 214 | 195 | 170 | 159 | 185 | 243 | 248 |
| 13:15~<br>13:20 | 175 | 159 | 165 | 181 | 219 | 261 | 217 | 199 | 140 | 199 | 202 | 189 | 270 | 254 | 187 | 171 | 179 | 191 | 203 | 180 | 244 | 247 | 234 | 145 | 131 | 163 | 209 | 247 |
| 13:20~<br>13:25 | 191 | 166 | 183 | 171 | 189 | 282 | 251 | 158 | 217 | 188 | 190 | 215 | 238 | 246 | 186 | 143 | 182 | 183 | 163 | 233 | 271 | 210 | 224 | 146 | 180 | 218 | 218 | 270 |
| 13:25~<br>13:30 | 175 | 181 | 208 | 180 | 190 | 259 | 281 | 182 | 193 | 172 | 188 | 200 | 255 | 185 | 185 | 186 | 150 | 162 | 170 | 212 | 271 | 215 | 193 | 170 | 162 | 182 | 232 | 228 |
| 13:30~<br>13:35 | 205 | 197 | 162 | 140 | 164 | 328 | 273 | 177 | 199 | 192 | 160 | 196 | 217 | 239 | 179 | 166 | 180 | 201 | 197 | 233 | 244 | 233 | 229 | 176 | 204 | 188 | 237 | 223 |
| 13:35~<br>13:40 | 172 | 185 | 178 | 191 | 220 | 301 | 292 | 140 | 191 | 202 | 153 | 172 | 213 | 208 | 169 | 193 | 204 | 203 | 215 | 202 | 251 | 216 | 215 | 163 | 173 | 212 | 211 | 213 |
| 13:40~<br>13:45 | 213 | 163 | 191 | 192 | 199 | 324 | 253 | 172 | 172 | 217 | 186 | 200 | 220 | 240 | 177 | 153 | 150 | 167 | 173 | 232 | 243 | 231 | 206 | 195 | 160 | 200 | 272 | 177 |

|                 |     |     |     |     |     |     |     |     |     |     |     |     |     |     |     |     |     |     |     |     |     |     |     |     |     |     |     |     |
|-----------------|-----|-----|-----|-----|-----|-----|-----|-----|-----|-----|-----|-----|-----|-----|-----|-----|-----|-----|-----|-----|-----|-----|-----|-----|-----|-----|-----|-----|
| 13:45~<br>13:50 | 175 | 172 | 219 | 189 | 206 | 301 | 230 | 159 | 245 | 189 | 176 | 230 | 263 | 246 | 178 | 183 | 166 | 162 | 207 | 219 | 264 | 244 | 198 | 173 | 161 | 168 | 228 | 246 |
| 13:50~<br>13:55 | 183 | 191 | 170 | 178 | 189 | 284 | 243 | 173 | 182 | 190 | 161 | 207 | 221 | 203 | 211 | 143 | 184 | 191 | 162 | 211 | 252 | 251 | 209 | 197 | 197 | 180 | 204 | 229 |
| 13:55~<br>14:00 | 163 | 164 | 179 | 199 | 166 | 243 | 269 | 178 | 176 | 166 | 170 | 181 | 265 | 247 | 168 | 172 | 170 | 179 | 198 | 213 | 238 | 217 | 225 | 202 | 133 | 236 | 244 | 221 |
| 14:00~<br>14:05 | 177 | 137 | 173 | 195 | 167 | 246 | 237 | 172 | 219 | 179 | 182 | 213 | 251 | 235 | 168 | 164 | 163 | 149 | 194 | 208 | 232 | 196 | 250 | 142 | 167 | 173 | 190 | 202 |
| 14:05~<br>14:10 | 188 | 170 | 196 | 184 | 124 | 237 | 246 | 198 | 211 | 178 | 174 | 235 | 255 | 224 | 193 | 138 | 160 | 200 | 233 | 210 | 267 | 222 | 246 | 179 | 199 | 232 | 208 | 238 |
| 14:10~<br>14:15 | 177 | 174 | 199 | 156 | 191 | 258 | 274 | 171 | 159 | 180 | 192 | 214 | 249 | 284 | 156 | 195 | 184 | 146 | 171 | 211 | 227 | 219 | 229 | 202 | 184 | 194 | 197 | 246 |
| 14:15~<br>14:20 | 169 | 172 | 193 | 189 | 204 | 282 | 261 | 179 | 171 | 211 | 186 | 236 | 308 | 220 | 162 | 171 | 176 | 191 | 212 | 229 | 249 | 233 | 279 | 166 | 208 | 225 | 236 | 203 |
| 14:20~<br>14:25 | 198 | 203 | 190 | 181 | 213 | 278 | 262 | 150 | 202 | 211 | 185 | 254 | 230 | 248 | 147 | 196 | 193 | 160 | 216 | 219 | 260 | 273 | 259 | 187 | 175 | 192 | 229 | 205 |
| 14:25~<br>14:30 | 183 | 166 | 213 | 165 | 204 | 275 | 279 | 200 | 218 | 212 | 211 | 240 | 230 | 252 | 167 | 183 | 207 | 192 | 231 | 226 | 241 | 219 | 222 | 172 | 194 | 224 | 203 | 215 |
| 14:30~<br>14:35 | 194 | 192 | 173 | 209 | 238 | 288 | 233 | 203 | 195 | 225 | 170 | 226 | 258 | 223 | 210 | 162 | 190 | 173 | 210 | 213 | 246 | 239 | 254 | 191 | 189 | 196 | 268 | 216 |
| 14:35~<br>14:40 | 188 | 206 | 186 | 210 | 231 | 278 | 304 | 236 | 213 | 208 | 177 | 241 | 290 | 226 | 203 | 165 | 200 | 178 | 199 | 221 | 244 | 229 | 249 | 210 | 168 | 206 | 221 | 223 |
| 14:40~<br>14:45 | 173 | 171 | 219 | 232 | 236 | 262 | 285 | 209 | 213 | 192 | 205 | 253 | 281 | 276 | 209 | 188 | 197 | 174 | 176 | 261 | 240 | 286 | 216 | 183 | 189 | 193 | 247 | 204 |
| 14:45~<br>14:50 | 212 | 200 | 202 | 205 | 207 | 260 | 258 | 195 | 202 | 250 | 210 | 298 | 277 | 245 | 172 | 174 | 239 | 193 | 225 | 201 | 272 | 226 | 228 | 173 | 219 | 199 | 233 | 223 |



|                 |     |     |     |     |     |     |     |     |     |     |     |     |     |     |     |     |     |     |     |     |     |     |     |     |     |     |     |     |
|-----------------|-----|-----|-----|-----|-----|-----|-----|-----|-----|-----|-----|-----|-----|-----|-----|-----|-----|-----|-----|-----|-----|-----|-----|-----|-----|-----|-----|-----|
| 14:50~<br>14:55 | 231 | 223 | 213 | 194 | 194 | 308 | 230 | 234 | 239 | 189 | 194 | 209 | 309 | 283 | 228 | 174 | 217 | 168 | 237 | 251 | 289 | 233 | 263 | 236 | 169 | 200 | 248 | 201 |
| 14:55~<br>15:00 | 217 | 209 | 230 | 203 | 222 | 307 | 259 | 197 | 215 | 159 | 187 | 275 | 252 | 304 | 212 | 205 | 222 | 181 | 208 | 259 | 236 | 240 | 280 | 259 | 222 | 231 | 252 | 256 |
| 15:00~<br>15:05 | 250 | 210 | 231 | 208 | 181 | 277 | 303 | 196 | 233 | 205 | 199 | 223 | 290 | 262 | 207 | 216 | 222 | 220 | 241 | 227 | 287 | 306 | 248 | 216 | 215 | 237 | 237 | 218 |
| 15:05~<br>15:10 | 254 | 192 | 218 | 239 | 214 | 335 | 324 | 206 | 220 | 235 | 201 | 238 | 287 | 272 | 193 | 223 | 208 | 195 | 248 | 221 | 285 | 248 | 290 | 237 | 225 | 244 | 255 | 265 |
| 15:10~<br>15:15 | 229 | 204 | 209 | 242 | 257 | 285 | 330 | 244 | 220 | 246 | 217 | 293 | 262 | 256 | 248 | 232 | 231 | 224 | 268 | 274 | 308 | 237 | 257 | 215 | 223 | 310 | 245 | 261 |
| 15:15~<br>15:20 | 247 | 251 | 224 | 219 | 254 | 272 | 303 | 229 | 292 | 277 | 218 | 285 | 325 | 252 | 221 | 228 | 264 | 207 | 262 | 235 | 228 | 254 | 217 | 235 | 203 | 225 | 291 | 250 |
| 15:20~<br>15:25 | 225 | 213 | 262 | 235 | 257 | 297 | 305 | 228 | 260 | 275 | 240 | 249 | 293 | 353 | 217 | 202 | 254 | 218 | 238 | 247 | 240 | 219 | 223 | 257 | 217 | 246 | 251 | 233 |
| 15:25~<br>15:30 | 260 | 261 | 238 | 216 | 261 | 348 | 302 | 221 | 272 | 277 | 254 | 297 | 286 | 268 | 233 | 252 | 229 | 192 | 264 | 284 | 245 | 273 | 249 | 235 | 211 | 272 | 245 | 219 |
| 15:30~<br>15:35 | 215 | 257 | 210 | 199 | 247 | 321 | 363 | 212 | 244 | 287 | 248 | 293 | 302 | 254 | 233 | 226 | 237 | 220 | 244 | 282 | 251 | 255 | 238 | 223 | 235 | 243 | 274 | 267 |
| 15:35~<br>15:40 | 223 | 235 | 230 | 208 | 278 | 325 | 299 | 201 | 254 | 269 | 243 | 290 | 329 | 261 | 242 | 232 | 227 | 226 | 253 | 244 | 279 | 285 | 211 | 196 | 243 | 234 | 227 | 275 |
| 15:40~<br>15:45 | 251 | 267 | 205 | 227 | 249 | 333 | 279 | 202 | 220 | 276 | 237 | 288 | 269 | 233 | 222 | 204 | 222 | 212 | 235 | 256 | 300 | 277 | 226 | 255 | 199 | 251 | 269 | 272 |
| 15:45~<br>15:50 | 229 | 233 | 206 | 234 | 246 | 329 | 280 | 253 | 265 | 274 | 269 | 282 | 249 | 245 | 239 | 210 | 224 | 266 | 261 | 245 | 275 | 244 | 249 | 248 | 227 | 245 | 298 | 286 |
| 15:50~<br>15:55 | 238 | 215 | 221 | 232 | 283 | 293 | 291 | 216 | 236 | 247 | 253 | 271 | 275 | 241 | 198 | 200 | 211 | 185 | 223 | 296 | 280 | 289 | 237 | 194 | 265 | 202 | 259 | 210 |

|                 |     |     |     |     |     |     |     |     |     |     |     |     |     |     |     |     |     |     |     |     |     |     |     |     |     |     |     |     |
|-----------------|-----|-----|-----|-----|-----|-----|-----|-----|-----|-----|-----|-----|-----|-----|-----|-----|-----|-----|-----|-----|-----|-----|-----|-----|-----|-----|-----|-----|
| 15:55~<br>16:00 | 209 | 210 | 194 | 285 | 221 | 309 | 236 | 234 | 231 | 214 | 217 | 242 | 328 | 279 | 207 | 203 | 263 | 247 | 246 | 257 | 238 | 244 | 272 | 208 | 209 | 214 | 265 | 235 |
| 16:00~<br>16:05 | 210 | 199 | 256 | 226 | 186 | 300 | 319 | 233 | 196 | 235 | 219 | 245 | 287 | 269 | 219 | 214 | 190 | 236 | 244 | 274 | 232 | 236 | 244 | 212 | 227 | 254 | 251 | 264 |
| 16:05~<br>16:10 | 216 | 262 | 225 | 269 | 239 | 346 | 284 | 188 | 232 | 261 | 275 | 281 | 279 | 298 | 215 | 207 | 267 | 246 | 218 | 297 | 251 | 238 | 268 | 214 | 248 | 283 | 292 | 223 |
| 16:10~<br>16:15 | 234 | 233 | 249 | 271 | 277 | 326 | 274 | 275 | 244 | 263 | 271 | 272 | 221 | 266 | 221 | 218 | 261 | 254 | 258 | 321 | 235 | 221 | 237 | 243 | 244 | 233 | 266 | 220 |
| 16:15~<br>16:20 | 216 | 239 | 222 | 271 | 304 | 398 | 331 | 261 | 257 | 247 | 211 | 285 | 310 | 306 | 215 | 272 | 252 | 250 | 232 | 295 | 226 | 260 | 222 | 201 | 247 | 284 | 290 | 284 |
| 16:20~<br>16:25 | 216 | 269 | 277 | 273 | 294 | 441 | 326 | 239 | 269 | 262 | 280 | 255 | 285 | 284 | 240 | 263 | 274 | 279 | 249 | 266 | 239 | 249 | 231 | 229 | 266 | 268 | 289 | 258 |
| 16:25~<br>16:30 | 219 | 246 | 272 | 289 | 298 | 383 | 307 | 245 | 295 | 279 | 275 | 273 | 265 | 279 | 288 | 255 | 287 | 241 | 267 | 295 | 330 | 259 | 241 | 219 | 271 | 276 | 307 | 232 |
| 16:30~<br>16:35 | 196 | 245 | 260 | 235 | 296 | 350 | 278 | 273 | 233 | 248 | 266 | 240 | 287 | 252 | 252 | 270 | 231 | 304 | 256 | 295 | 237 | 247 | 240 | 273 | 242 | 292 | 270 | 223 |
| 16:35~<br>16:40 | 267 | 231 | 287 | 340 | 307 | 321 | 267 | 258 | 322 | 288 | 249 | 283 | 277 | 308 | 250 | 235 | 298 | 298 | 272 | 295 | 287 | 237 | 252 | 279 | 301 | 269 | 287 | 222 |
| 16:40~<br>16:45 | 259 | 250 | 265 | 308 | 264 | 376 | 319 | 273 | 254 | 268 | 296 | 249 | 297 | 308 | 242 | 264 | 288 | 267 | 305 | 326 | 299 | 247 | 241 | 278 | 227 | 285 | 359 | 274 |
| 16:45~<br>16:50 | 287 | 248 | 266 | 307 | 293 | 365 | 372 | 305 | 248 | 255 | 282 | 266 | 333 | 300 | 242 | 281 | 271 | 281 | 273 | 327 | 296 | 320 | 270 | 276 | 293 | 332 | 370 | 257 |
| 16:50~<br>16:55 | 301 | 263 | 299 | 278 | 252 | 331 | 291 | 247 | 255 | 246 | 276 | 291 | 305 | 315 | 231 | 223 | 267 | 260 | 250 | 304 | 260 | 261 | 240 | 226 | 240 | 337 | 285 | 261 |
| 16:55~<br>17:00 | 275 | 248 | 285 | 326 | 292 | 363 | 310 | 280 | 224 | 304 | 328 | 261 | 289 | 314 | 267 | 223 | 291 | 257 | 297 | 287 | 282 | 247 | 232 | 254 | 253 | 288 | 344 | 265 |

|                 |     |     |     |     |     |     |     |     |     |     |     |     |     |     |     |     |     |     |     |     |     |     |     |     |     |     |     |     |
|-----------------|-----|-----|-----|-----|-----|-----|-----|-----|-----|-----|-----|-----|-----|-----|-----|-----|-----|-----|-----|-----|-----|-----|-----|-----|-----|-----|-----|-----|
| 17:00~<br>17:05 | 298 | 274 | 285 | 336 | 306 | 391 | 309 | 310 | 266 | 246 | 335 | 259 | 305 | 335 | 307 | 265 | 303 | 335 | 301 | 315 | 313 | 255 | 243 | 279 | 286 | 333 | 303 | 243 |
| 17:05~<br>17:10 | 381 | 379 | 362 | 456 | 338 | 399 | 347 | 388 | 345 | 356 | 387 | 334 | 322 | 322 | 352 | 385 | 397 | 368 | 342 | 404 | 302 | 313 | 266 | 386 | 394 | 398 | 294 | 290 |
| 17:10~<br>17:15 | 470 | 476 | 470 | 434 | 452 | 427 | 344 | 418 | 379 | 395 | 409 | 411 | 371 | 300 | 462 | 458 | 408 | 434 | 412 | 476 | 328 | 293 | 276 | 505 | 550 | 446 | 322 | 342 |
| 17:15~<br>17:20 | 504 | 491 | 492 | 445 | 475 | 404 | 386 | 476 | 436 | 427 | 460 | 442 | 354 | 309 | 514 | 508 | 470 | 394 | 408 | 512 | 331 | 322 | 272 | 482 | 521 | 494 | 363 | 293 |
| 17:20~<br>17:25 | 522 | 497 | 425 | 412 | 461 | 395 | 364 | 392 | 390 | 392 | 470 | 470 | 378 | 279 | 444 | 446 | 477 | 436 | 421 | 529 | 300 | 330 | 282 | 433 | 412 | 403 | 395 | 295 |
| 17:25~<br>17:30 | 450 | 443 | 419 | 375 | 372 | 419 | 337 | 415 | 398 | 468 | 366 | 427 | 387 | 348 | 428 | 379 | 380 | 406 | 364 | 504 | 291 | 290 | 252 | 462 | 374 | 449 | 341 | 292 |
| 17:30~<br>17:35 | 456 | 411 | 406 | 410 | 421 | 433 | 330 | 381 | 436 | 461 | 397 | 453 | 404 | 315 | 433 | 438 | 440 | 377 | 412 | 489 | 277 | 322 | 249 | 463 | 437 | 444 | 394 | 300 |
| 17:35~<br>17:40 | 675 | 568 | 567 | 636 | 557 | 451 | 300 | 613 | 637 | 549 | 549 | 601 | 404 | 319 | 560 | 533 | 575 | 565 | 559 | 607 | 360 | 325 | 241 | 608 | 610 | 559 | 364 | 271 |
| 17:40~<br>17:45 | 802 | 778 | 815 | 750 | 725 | 476 | 301 | 816 | 815 | 821 | 704 | 771 | 410 | 277 | 767 | 821 | 842 | 770 | 724 | 708 | 327 | 263 | 236 | 834 | 721 | 698 | 394 | 293 |
| 17:45~<br>17:50 | 817 | 789 | 728 | 797 | 746 | 495 | 312 | 866 | 751 | 734 | 731 | 699 | 437 | 311 | 768 | 823 | 769 | 812 | 661 | 690 | 309 | 295 | 241 | 784 | 730 | 708 | 376 | 278 |
| 17:50~<br>17:55 | 674 | 711 | 668 | 645 | 621 | 444 | 307 | 780 | 688 | 689 | 627 | 631 | 342 | 316 | 660 | 711 | 752 | 733 | 759 | 723 | 310 | 275 | 229 | 658 | 666 | 640 | 364 | 223 |
| 17:55~<br>18:00 | 652 | 660 | 628 | 563 | 635 | 422 | 260 | 732 | 662 | 616 | 632 | 609 | 285 | 271 | 650 | 642 | 643 | 652 | 630 | 709 | 297 | 274 | 213 | 618 | 615 | 644 | 282 | 190 |
| 18:00~<br>18:05 | 616 | 641 | 583 | 583 | 673 | 441 | 258 | 636 | 607 | 554 | 574 | 534 | 323 | 273 | 568 | 579 | 718 | 594 | 684 | 609 | 271 | 271 | 206 | 566 | 526 | 550 | 350 | 285 |

|                 |     |     |     |     |     |     |     |     |     |     |     |     |     |     |     |     |     |     |     |     |     |     |     |     |     |     |     |     |
|-----------------|-----|-----|-----|-----|-----|-----|-----|-----|-----|-----|-----|-----|-----|-----|-----|-----|-----|-----|-----|-----|-----|-----|-----|-----|-----|-----|-----|-----|
| 18:05~<br>18:10 | 666 | 661 | 660 | 671 | 711 | 438 | 299 | 704 | 639 | 590 | 585 | 646 | 416 | 285 | 595 | 622 | 626 | 573 | 616 | 630 | 304 | 267 | 212 | 608 | 608 | 562 | 390 | 305 |
| 18:10~<br>18:15 | 662 | 660 | 712 | 768 | 610 | 481 | 309 | 700 | 594 | 600 | 537 | 556 | 387 | 277 | 619 | 625 | 675 | 652 | 626 | 675 | 301 | 283 | 264 | 570 | 700 | 605 | 365 | 302 |
| 18:15~<br>18:20 | 699 | 680 | 676 | 611 | 632 | 472 | 287 | 644 | 623 | 573 | 592 | 542 | 352 | 297 | 642 | 665 | 596 | 653 | 660 | 625 | 337 | 284 | 203 | 606 | 669 | 597 | 329 | 305 |
| 18:20~<br>18:25 | 658 | 598 | 612 | 517 | 549 | 446 | 306 | 621 | 577 | 557 | 483 | 525 | 367 | 303 | 600 | 501 | 590 | 635 | 518 | 578 | 301 | 270 | 230 | 554 | 535 | 525 | 319 | 263 |
| 18:25~<br>18:30 | 545 | 517 | 538 | 490 | 507 | 389 | 240 | 523 | 477 | 516 | 433 | 414 | 296 | 257 | 580 | 449 | 467 | 494 | 479 | 506 | 263 | 246 | 180 | 529 | 479 | 523 | 292 | 245 |
| 18:30~<br>18:35 | 490 | 425 | 418 | 432 | 468 | 348 | 250 | 498 | 436 | 457 | 423 | 388 | 267 | 181 | 514 | 402 | 422 | 453 | 473 | 510 | 245 | 228 | 172 | 407 | 451 | 428 | 262 | 233 |
| 18:35~<br>18:40 | 426 | 428 | 392 | 374 | 422 | 328 | 209 | 402 | 384 | 354 | 352 | 400 | 252 | 209 | 378 | 330 | 402 | 386 | 364 | 393 | 232 | 240 | 177 | 377 | 370 | 349 | 238 | 233 |
| 18:40~<br>18:45 | 357 | 314 | 346 | 376 | 402 | 314 | 215 | 385 | 382 | 310 | 353 | 307 | 265 | 209 | 326 | 318 | 351 | 376 | 356 | 405 | 207 | 217 | 155 | 336 | 321 | 456 | 272 | 186 |
| 18:45~<br>18:50 | 329 | 328 | 331 | 293 | 324 | 303 | 213 | 374 | 286 | 313 | 299 | 263 | 244 | 189 | 328 | 298 | 323 | 401 | 340 | 320 | 237 | 215 | 204 | 299 | 299 | 381 | 277 | 229 |
| 18:50~<br>18:55 | 357 | 254 | 294 | 300 | 382 | 288 | 218 | 362 | 292 | 317 | 295 | 276 | 238 | 210 | 269 | 297 | 263 | 318 | 315 | 349 | 238 | 221 | 193 | 297 | 256 | 311 | 213 | 166 |
| 18:55~<br>19:00 | 305 | 166 | 247 | 258 | 321 | 247 | 227 | 295 | 267 | 269 | 284 | 241 | 213 | 234 | 266 | 238 | 197 | 290 | 321 | 322 | 174 | 235 | 198 | 257 | 281 | 295 | 215 | 200 |
| 19:00~<br>19:05 | 276 | 239 | 285 | 253 | 263 | 239 | 213 | 271 | 253 | 267 | 203 | 243 | 218 | 148 | 252 | 233 | 297 | 277 | 296 | 284 | 203 | 173 | 195 | 275 | 251 | 261 | 149 | 175 |
| 19:05~<br>19:10 | 241 | 289 | 236 | 219 | 260 | 224 | 184 | 286 | 260 | 223 | 229 | 220 | 184 | 180 | 255 | 202 | 259 | 294 | 288 | 292 | 185 | 250 | 208 | 282 | 220 | 285 | 161 | 151 |

|                 |     |     |     |     |     |     |     |     |     |     |     |     |     |     |     |     |     |     |     |     |     |     |     |     |     |     |     |     |
|-----------------|-----|-----|-----|-----|-----|-----|-----|-----|-----|-----|-----|-----|-----|-----|-----|-----|-----|-----|-----|-----|-----|-----|-----|-----|-----|-----|-----|-----|
| 19:10~<br>19:15 | 195 | 279 | 233 | 206 | 215 | 233 | 144 | 217 | 262 | 219 | 256 | 243 | 221 | 198 | 251 | 216 | 186 | 225 | 252 | 294 | 213 | 217 | 211 | 269 | 231 | 241 | 197 | 177 |
| 19:15~<br>19:20 | 187 | 198 | 214 | 196 | 186 | 215 | 177 | 223 | 216 | 208 | 176 | 227 | 185 | 210 | 211 | 202 | 206 | 247 | 209 | 265 | 195 | 197 | 157 | 208 | 201 | 229 | 213 | 170 |
| 19:20~<br>19:25 | 187 | 188 | 167 | 181 | 223 | 237 | 170 | 201 | 188 | 183 | 167 | 187 | 161 | 159 | 185 | 172 | 212 | 193 | 198 | 224 | 176 | 213 | 157 | 207 | 175 | 254 | 167 | 163 |
| 19:25~<br>19:30 | 181 | 181 | 153 | 204 | 219 | 185 | 154 | 222 | 170 | 159 | 216 | 182 | 182 | 151 | 217 | 160 | 187 | 206 | 201 | 241 | 205 | 178 | 159 | 136 | 181 | 196 | 176 | 158 |
| 19:30~<br>19:35 | 121 | 166 | 154 | 180 | 190 | 181 | 123 | 187 | 194 | 162 | 175 | 159 | 210 | 200 | 200 | 157 | 212 | 182 | 211 | 217 | 173 | 174 | 137 | 194 | 146 | 220 | 172 | 178 |
| 19:35~<br>19:40 | 146 | 167 | 174 | 169 | 207 | 174 | 187 | 164 | 192 | 166 | 157 | 171 | 195 | 173 | 200 | 170 | 181 | 217 | 200 | 209 | 176 | 170 | 123 | 176 | 167 | 189 | 192 | 151 |
| 19:40~<br>19:45 | 161 | 174 | 202 | 162 | 193 | 155 | 133 | 184 | 187 | 164 | 215 | 190 | 175 | 164 | 159 | 184 | 156 | 171 | 155 | 214 | 167 | 164 | 165 | 168 | 170 | 184 | 168 | 182 |
| 19:45~<br>19:50 | 154 | 166 | 135 | 173 | 165 | 158 | 148 | 175 | 178 | 174 | 173 | 171 | 167 | 138 | 166 | 138 | 137 | 181 | 179 | 275 | 187 | 192 | 138 | 148 | 140 | 193 | 160 | 142 |
| 19:50~<br>19:55 | 124 | 186 | 160 | 153 | 184 | 144 | 137 | 145 | 144 | 141 | 168 | 153 | 134 | 147 | 136 | 125 | 151 | 153 | 140 | 177 | 161 | 123 | 141 | 153 | 154 | 175 | 171 | 124 |
| 19:55~<br>20:00 | 151 | 195 | 152 | 149 | 188 | 169 | 129 | 159 | 164 | 154 | 180 | 122 | 180 | 151 | 144 | 175 | 177 | 172 | 155 | 187 | 102 | 117 | 159 | 153 | 154 | 252 | 148 | 109 |
| 20:00~<br>20:05 | 117 | 185 | 157 | 264 | 157 | 164 | 118 | 157 | 171 | 156 | 158 | 167 | 162 | 142 | 161 | 175 | 168 | 183 | 147 | 154 | 165 | 144 | 155 | 139 | 157 | 185 | 149 | 110 |
| 20:05~<br>20:10 | 173 | 148 | 152 | 218 | 140 | 128 | 115 | 149 | 166 | 150 | 176 | 135 | 175 | 132 | 152 | 163 | 167 | 166 | 121 | 181 | 124 | 148 | 137 | 140 | 157 | 206 | 130 | 146 |
| 20:10~<br>20:15 | 133 | 188 | 218 | 181 | 168 | 153 | 154 | 154 | 194 | 181 | 164 | 129 | 194 | 189 | 177 | 187 | 196 | 151 | 159 | 186 | 169 | 145 | 136 | 171 | 153 | 188 | 151 | 132 |

|                 |     |     |     |     |     |     |     |     |     |     |     |     |     |     |     |     |     |     |     |     |     |     |     |     |     |     |     |     |
|-----------------|-----|-----|-----|-----|-----|-----|-----|-----|-----|-----|-----|-----|-----|-----|-----|-----|-----|-----|-----|-----|-----|-----|-----|-----|-----|-----|-----|-----|
| 20:15~<br>20:20 | 137 | 211 | 183 | 166 | 164 | 147 | 169 | 192 | 170 | 191 | 206 | 150 | 176 | 143 | 156 | 202 | 171 | 154 | 154 | 201 | 163 | 104 | 138 | 183 | 172 | 205 | 133 | 127 |
| 20:20~<br>20:25 | 131 | 175 | 175 | 142 | 185 | 147 | 140 | 170 | 173 | 221 | 160 | 130 | 195 | 133 | 156 | 169 | 213 | 153 | 154 | 177 | 152 | 168 | 134 | 169 | 162 | 221 | 192 | 130 |
| 20:25~<br>20:30 | 165 | 191 | 208 | 172 | 124 | 164 | 125 | 162 | 161 | 210 | 151 | 138 | 167 | 157 | 144 | 179 | 222 | 158 | 174 | 171 | 159 | 124 | 110 | 156 | 148 | 177 | 165 | 130 |
| 20:30~<br>20:35 | 146 | 170 | 171 | 187 | 173 | 135 | 102 | 180 | 138 | 180 | 188 | 162 | 148 | 167 | 150 | 158 | 135 | 161 | 170 | 189 | 141 | 159 | 114 | 180 | 129 | 175 | 178 | 150 |
| 20:35~<br>20:40 | 150 | 176 | 177 | 149 | 165 | 165 | 99  | 138 | 160 | 191 | 156 | 173 | 146 | 158 | 167 | 186 | 157 | 174 | 141 | 167 | 139 | 120 | 130 | 147 | 151 | 192 | 175 | 130 |
| 20:40~<br>20:45 | 165 | 150 | 151 | 125 | 169 | 149 | 113 | 145 | 182 | 162 | 153 | 133 | 174 | 148 | 137 | 161 | 158 | 185 | 145 | 168 | 119 | 115 | 114 | 150 | 225 | 164 | 206 | 110 |
| 20:45~<br>20:50 | 150 | 179 | 187 | 160 | 176 | 184 | 113 | 150 | 155 | 163 | 178 | 173 | 184 | 145 | 130 | 162 | 152 | 167 | 195 | 137 | 144 | 125 | 142 | 168 | 148 | 224 | 217 | 114 |
| 20:50~<br>20:55 | 134 | 151 | 157 | 132 | 180 | 147 | 100 | 159 | 142 | 179 | 163 | 146 | 168 | 166 | 118 | 167 | 180 | 184 | 164 | 181 | 132 | 145 | 125 | 130 | 134 | 190 | 142 | 123 |
| 20:55~<br>21:00 | 141 | 190 | 200 | 161 | 178 | 160 | 124 | 164 | 154 | 156 | 151 | 144 | 152 | 129 | 140 | 173 | 128 | 165 | 171 | 150 | 122 | 100 | 137 | 129 | 144 | 174 | 136 | 120 |
| 21:00~<br>21:05 | 146 | 183 | 169 | 188 | 201 | 129 | 121 | 173 | 177 | 155 | 175 | 136 | 178 | 138 | 174 | 161 | 164 | 175 | 153 | 162 | 122 | 139 | 90  | 147 | 186 | 171 | 155 | 102 |
| 21:05~<br>21:10 | 152 | 221 | 243 | 212 | 232 | 149 | 136 | 222 | 203 | 201 | 178 | 163 | 147 | 123 | 169 | 240 | 193 | 228 | 160 | 162 | 148 | 144 | 124 | 173 | 162 | 233 | 145 | 157 |
| 21:10~<br>21:15 | 187 | 236 | 191 | 214 | 210 | 181 | 93  | 185 | 162 | 193 | 162 | 136 | 143 | 147 | 209 | 215 | 225 | 242 | 207 | 205 | 148 | 131 | 95  | 201 | 172 | 194 | 192 | 154 |
| 21:15~<br>21:20 | 160 | 173 | 138 | 125 | 180 | 152 | 124 | 140 | 137 | 163 | 148 | 144 | 202 | 128 | 152 | 147 | 153 | 174 | 156 | 200 | 174 | 157 | 113 | 143 | 143 | 200 | 140 | 105 |

|                 |     |     |     |     |     |     |     |     |     |     |     |     |     |     |     |     |     |     |     |     |     |     |     |     |     |     |     |     |
|-----------------|-----|-----|-----|-----|-----|-----|-----|-----|-----|-----|-----|-----|-----|-----|-----|-----|-----|-----|-----|-----|-----|-----|-----|-----|-----|-----|-----|-----|
| 21:20~<br>21:25 | 115 | 126 | 157 | 147 | 159 | 150 | 119 | 138 | 141 | 160 | 140 | 80  | 176 | 134 | 120 | 118 | 125 | 151 | 140 | 191 | 112 | 115 | 124 | 131 | 125 | 178 | 146 | 117 |
| 21:25~<br>21:30 | 136 | 112 | 128 | 113 | 136 | 136 | 90  | 121 | 143 | 136 | 165 | 122 | 138 | 82  | 106 | 116 | 131 | 133 | 143 | 169 | 140 | 113 | 87  | 105 | 119 | 183 | 181 | 108 |
| 21:30~<br>21:35 | 112 | 119 | 172 | 120 | 120 | 136 | 138 | 98  | 118 | 132 | 143 | 91  | 157 | 135 | 131 | 141 | 134 | 122 | 130 | 166 | 100 | 95  | 111 | 111 | 121 | 161 | 135 | 120 |
| 21:35~<br>21:40 | 127 | 161 | 159 | 142 | 127 | 130 | 93  | 122 | 150 | 152 | 136 | 136 | 129 | 97  | 126 | 117 | 145 | 159 | 142 | 161 | 132 | 82  | 98  | 106 | 78  | 139 | 118 | 92  |
| 21:40~<br>21:45 | 102 | 117 | 160 | 128 | 145 | 137 | 96  | 112 | 98  | 137 | 125 | 113 | 119 | 94  | 132 | 120 | 112 | 112 | 122 | 136 | 97  | 87  | 97  | 94  | 91  | 144 | 129 | 71  |
| 21:45~<br>21:50 | 93  | 121 | 106 | 94  | 149 | 120 | 97  | 118 | 113 | 96  | 97  | 104 | 143 | 98  | 108 | 106 | 138 | 121 | 102 | 130 | 101 | 90  | 97  | 106 | 102 | 140 | 144 | 96  |
| 21:50~<br>21:55 | 79  | 108 | 126 | 130 | 109 | 110 | 67  | 78  | 107 | 88  | 119 | 118 | 116 | 77  | 80  | 117 | 128 | 117 | 166 | 150 | 104 | 134 | 70  | 96  | 102 | 109 | 91  | 66  |
| 21:55~<br>22:00 | 65  | 102 | 104 | 95  | 146 | 78  | 79  | 101 | 75  | 72  | 78  | 95  | 80  | 70  | 95  | 92  | 108 | 93  | 133 | 138 | 100 | 88  | 73  | 84  | 83  | 103 | 107 | 63  |
| 22:00~<br>22:05 | 64  | 72  | 79  | 102 | 104 | 106 | 93  | 77  | 74  | 95  | 90  | 89  | 89  | 84  | 102 | 93  | 90  | 107 | 114 | 97  | 86  | 96  | 54  | 80  | 91  | 90  | 119 | 76  |
| 22:05~<br>22:10 | 89  | 83  | 88  | 101 | 110 | 94  | 132 | 95  | 105 | 111 | 102 | 94  | 107 | 104 | 94  | 102 | 100 | 120 | 109 | 130 | 109 | 109 | 77  | 109 | 96  | 117 | 113 | 85  |
| 22:10~<br>22:15 | 76  | 91  | 112 | 78  | 81  | 104 | 84  | 68  | 104 | 94  | 82  | 108 | 110 | 88  | 108 | 103 | 89  | 91  | 114 | 110 | 98  | 88  | 79  | 106 | 86  | 93  | 113 | 89  |
| 22:15~<br>22:20 | 81  | 85  | 96  | 91  | 83  | 70  | 111 | 101 | 61  | 65  | 79  | 74  | 92  | 73  | 88  | 96  | 101 | 116 | 104 | 85  | 119 | 73  | 88  | 98  | 92  | 63  | 93  | 93  |
| 22:20~<br>22:25 | 142 | 121 | 149 | 112 | 77  | 92  | 103 | 90  | 81  | 54  | 83  | 73  | 70  | 72  | 130 | 108 | 146 | 130 | 78  | 81  | 79  | 83  | 122 | 159 | 105 | 101 | 72  | 149 |

|                 |     |     |     |     |     |    |    |    |     |     |    |     |     |     |     |     |     |     |    |     |    |    |     |     |     |     |     |     |
|-----------------|-----|-----|-----|-----|-----|----|----|----|-----|-----|----|-----|-----|-----|-----|-----|-----|-----|----|-----|----|----|-----|-----|-----|-----|-----|-----|
| 22:25~<br>22:30 | 143 | 120 | 181 | 187 | 74  | 76 | 79 | 40 | 85  | 83  | 54 | 55  | 96  | 150 | 126 | 194 | 169 | 150 | 67 | 96  | 55 | 77 | 168 | 125 | 164 | 78  | 72  | 152 |
| 22:30~<br>22:35 | 57  | 87  | 88  | 84  | 68  | 60 | 65 | 50 | 64  | 86  | 82 | 34  | 51  | 112 | 82  | 86  | 63  | 93  | 78 | 73  | 47 | 71 | 76  | 62  | 69  | 82  | 65  | 71  |
| 22:35~<br>22:40 | 45  | 46  | 64  | 50  | 42  | 52 | 59 | 62 | 54  | 46  | 85 | 39  | 89  | 70  | 64  | 78  | 68  | 77  | 58 | 78  | 54 | 62 | 66  | 45  | 54  | 97  | 56  | 54  |
| 22:40~<br>22:45 | 35  | 49  | 54  | 58  | 142 | 54 | 56 | 76 | 91  | 114 | 52 | 61  | 110 | 37  | 37  | 49  | 47  | 37  | 99 | 135 | 52 | 89 | 55  | 51  | 43  | 116 | 113 | 50  |
| 22:45~<br>22:50 | 48  | 24  | 43  | 49  | 108 | 82 | 54 | 85 | 83  | 77  | 63 | 60  | 137 | 41  | 38  | 45  | 66  | 50  | 77 | 100 | 59 | 69 | 27  | 42  | 53  | 101 | 119 | 52  |
| 22:50~<br>22:55 | 29  | 29  | 34  | 25  | 85  | 58 | 49 | 79 | 102 | 80  | 85 | 67  | 124 | 28  | 42  | 30  | 49  | 41  | 93 | 118 | 75 | 53 | 25  | 34  | 37  | 106 | 118 | 41  |
| 22:55~<br>23:00 | 27  | 34  | 32  | 26  | 103 | 46 | 41 | 88 | 79  | 79  | 28 | 111 | 97  | 26  | 26  | 40  | 37  | 40  | 71 | 116 | 63 | 43 | 27  | 23  | 30  | 109 | 70  | 32  |
